1 **GrgA controls *Chlamydia trachomatis* growth and development by**  
2 **regulating expression of transcription factors Euo and HrcA**

3

4 Wurihan Wurihan<sup>1</sup>, Yi Zou<sup>2,3</sup>, Alec M. Weber<sup>1</sup>, Korri Weldon<sup>2,3</sup>, Yehong Huang<sup>1,4</sup>, Zheng  
5 Gong<sup>1</sup>, Zhongzi Lou<sup>1,5</sup>, Samantha Sun<sup>1</sup>, Chengsheng Zhu<sup>6</sup>, Xiang Wu<sup>4</sup>, Jizhang Zhou<sup>5</sup>, Yaqun  
6 Wang<sup>7</sup>, Zhao Lai<sup>2,3</sup>, and Huizhou Fan<sup>1\*</sup>

7

8 <sup>1</sup> Department of Pharmacology, Robert Wood Johnson Medical School, Rutgers University,  
9 Piscataway, NJ 08854, USA

10 <sup>2</sup> Greehey Children's Cancer Research Institute, University of Texas Health San Antonio, San  
11 Antonio, TX 78229, USA

12 <sup>3</sup> Department of Molecule Medicine, University of Texas Health San Antonio, San Antonio, TX  
13 78229, USA

14 <sup>4</sup> Department of Parasitology, Central South University Xiangya Medical School, 110 Xiangya  
15 Road, Changsha, Hunan 410013, China

16 <sup>5</sup> Lanzhou Veterinary Research Institute, Chinese Academy of Agricultural Sciences, Lanzhou  
17 730046, China

18 <sup>6</sup> Department of Microbiology and Biochemistry, School of Environmental and Biological  
19 Sciences, Rutgers University, NJ 08873, USA

20 <sup>7</sup> Department of Biostatistics, School of Public Health, Rutgers University, NJ 08873, USA

21

22 \*Corresponding author: Dr. Huizhou Fan, Email: [huizhou.fan@rutgers.edu](mailto:huizhou.fan@rutgers.edu)

23

## 24 **ABSTRACT**

25 The obligate intracellular bacterium *Chlamydia trachomatis* is an important human pathogen  
26 whose biphasic developmental cycle consists of an infectious elementary body and a replicative  
27 reticulate body. Whereas  $\sigma^{66}$ , the primary sigma factor, is necessary for transcription of most  
28 chlamydial genes throughout the developmental cycle,  $\sigma^{28}$  is required for expression of some late  
29 genes. We previously showed that the *Chlamydia*-specific transcription factor GrgA physically  
30 interacts with both of these sigma factors and activates transcription from  $\sigma^{66}$ - and  $\sigma^{28}$ -dependent  
31 promoters *in vitro*. Here, we investigate the organismal functions of GrgA. We show that GrgA  
32 overexpression decreased RB proliferation via time-dependent transcriptomic changes.  
33 Significantly,  $\sigma^{66}$ -dependent genes that code for two important transcription repressors are among  
34 the direct targets of GrgA. One of these repressors is Euo, which prevents the expression of late  
35 genes during early phases. The other is HrcA, which regulates gene expression in response to heat  
36 shock. The direct regulon of GrgA also includes a  $\sigma^{28}$ -dependent gene that codes for the putative  
37 virulence factor PmpI. Conditional overexpression of Euo and HrcA also inhibited chlamydial  
38 growth and affected GrgA expression. Transcriptomic studies suggest that GrgA, Euo, and HrcA  
39 have distinct but overlapping indirect regulons. Furthermore, overexpression of either GrgA leads  
40 to decreased expression of numerous tRNAs. These findings indicate that a GrgA-mediated  
41 transcriptional regulatory network controls *C. trachomatis* growth and development.

## 42 **IMPORTANCE**

43 *Chlamydia trachomatis* is the most prevalent sexually transmitted bacterial pathogen worldwide  
44 and is a leading cause of preventable blindness in under-developed areas as well as developed  
45 countries. Previous studies showed that the novel transcription factor GrgA activated chlamydial  
46 gene transcription *in vitro*, but did not address the organismal function of GrgA. Here, we

47 demonstrate growth inhibition in *C. trachomatis* engineered to conditionally overexpress GrgA.  
48 GrgA overexpression immediately increases the expression of two other critical transcription  
49 factors (Euo and HrcA) and a candidate virulence factor (PmpI), among several other genes. We  
50 also reveal chlamydial growth reduction and transcriptomic changes including decreased GrgA  
51 mRNA levels in response to either Euo or HrcA overexpression. Thus, the transcription network  
52 controlled by GrgA likely plays a crucial role in chlamydial growth and pathogenesis.

## 53 INTRODUCTION

54 The Centers for Disease Control and Prevention (CDC) reports that chlamydia is the most common  
55 notifiable disease in the United States. Caused by infection with *Chlamydia trachomatis*, this  
56 sexually transmitted disease (STD) has comprised the majority of all STDs reported to CDC since  
57 1994 (1). The World Health Organization estimates 131 million new cases of *C. trachomatis*  
58 infection occur annually world-wide (2). Although infection with *C. trachomatis* is usually  
59 asymptomatic, untreated chlamydial infection is associated with high rates of infertility, pelvic  
60 inflammatory syndrome, abortion and/or premature birth, and ectopic pregnancy (1, 2). These  
61 serious complications exemplify the primary burden of disease. Furthermore, three *C. trachomatis*  
62 serotypes are known to cause ocular infection and blinding trachomatous trichiasis. These clinical  
63 manifestations are still common not only in many underdeveloped countries, but also in developed  
64 nations (3).

65 Chlamydiae are obligate intracellular Gram-negative bacteria with a unique developmental  
66 cycle characterized by two cellular forms (4). The small, electron-dense form termed elementary  
67 body (EB) is capable of extracellular survival but incapable of proliferation. After binding to  
68 receptors on the target cell membrane, the EB is taken into a cell membrane-derived vacuole  
69 through endocytosis (5). Within the vacuole termed inclusion, the EB differentiates into a larger,

70 less electron-dense form termed reticulate body (RB) within several hours. The RB replicates with  
71 a doubling time of 2 to 3 h. Around 24 h, some RBs start to re-differentiate back into EBs while  
72 others continue to proliferate. At the end of the cycle, EBs and residual RBs are released from host  
73 cells through either cell lysis or extrusion of entire inclusions (6).

74 The small *C. trachomatis* genome consists of a 1 million bp chromosome and a 7.5 kb  
75 plasmid. The chromosome carries less than 900 total protein-encoding genes and noncoding RNA  
76 genes. The plasmid encodes only 8 proteins (7). Previous cDNA microarray studies (8, 9)  
77 enumerate four successive stages of the developmental cycle. The immediate early stage is the first  
78 h when EBs are inside nascent inclusions near the plasma membrane. A small number of crucial  
79 genes are transcribed in this stage to establish an intracellular niche that enables EB survival,  
80 development into RBs, and eventual delivery of the inclusion to a perinuclear region. During the  
81 subsequent early stage, an additional number of genes are transcribed to complete the conversion  
82 of EBs into RBs. Midcycle commences upon the completion of EB-to-RB conversion and ends  
83 when RBs starts to differentiate back into EBs. Almost all genes are transcribed during this stage.  
84 Lastly, transcription of a smaller set of genes is initiated and/or upregulated before and during the  
85 late stage.

86 In bacteria, all genes are transcribed by one type of RNA polymerase (RNAP). The RNAP  
87 holoenzyme consists of a catalytic core enzyme with one of several different sigma factors ( $\sigma$ )  
88 that recognize various promoters (10). *C. trachomatis* encodes three  $\sigma$ s. A super majority of *C.*  
89 *trachomatis* promoters are  $\sigma^{66}$ -dependent, while some late genes possess  $\sigma^{28}$  promoters or both  $\sigma^{66}$   
90 and  $\sigma^{28}$  promoters (11-13). To date, only two late genes are thought to carry a  $\sigma^{54}$  promoter (14).  
91 Consistent with their roles in the developmental cycle, expression of the three  $\sigma$ s is also temporally

92 regulated (8, 15).  $\sigma^{66}$  mRNA is detected on microarray as early as 3 h postinoculation (hpi),  
93 whereas  $\sigma^{28}$  and  $\sigma^{54}$  mRNAs are not detected until 8 hpi (8).

94 Transcription activities of the RNAP are regulated by transcription factors (TFs).  
95 Interestingly, *C. trachomatis* encodes fewer than 20 TFs despite a complicated developmental  
96 cycle (16). Most of these TFs regulate gene expression in response to nutrient and mineral  
97 availability (17-30). In contrast, the transcription repressor HrcA controls response to heat shock  
98 (31, 32).

99 Only two *C. trachomatis* transcription factors demonstrate ability to control the chlamydial  
100 developmental cycle, Euo and CtcC. Euo is produced immediately after EBs enter host cells (8,  
101 33, 34) and binds late gene promoters to suppress transcription (11-13). CtcC is a part of a two-  
102 component system and is predicted to function as an activator of the  $\sigma^{54}$ -RNAP holoenzyme on  
103 the basis of orthologs in other bacteria (25).

104 GrgA is the newest chlamydial TF. Identified via promoter DNA pulldown, GrgA  
105 physically interacts with  $\sigma^{66}$  and  $\sigma^{28}$ , and activates transcription from both  $\sigma^{66}$ - and  $\sigma^{28}$ -dependent  
106 promoters *in vitro* (35-37). In this work, we investigated the organismal functions of GrgA.  
107 Through overexpression, growth characterization, transcriptomic studies, and protein expression  
108 analyses, we identify a GrgA-directed transcriptional regulatory network (TRN) that likely plays  
109 a critical role in chlamydial growth and development.

## 110 **RESULTS**

### 111 **GrgA overexpression inhibits *Chlamydia trachomatis* growth**

112 In our initial attempt to overexpress GrgA, we placed the GrgA open reading frame (ORF)  
113 downstream of a *Neisseria meningitidis* promoter ( $P_{nm}$ ) in the pGFP::SW2 plasmid (38) (Fig.  
114 S1A). With this resultant pGFP-CmR-GrgA::SW2 vector (Fig. S1B), we failed to obtain

115 transformants after three independent attempts despite consistent transformant production by the  
116 control pGFP::SWP plasmid. These negative data were an early suggestion that GrgA  
117 overexpression may be toxic.

118 Next, we constructed the pTRL2-NH-GrgA vector by placing His-tagged GrgA  
119 downstream of a  $P_{tet}$  promoter (Fig. S1C). pTRL2-NH-GrgA transformants of CtL2 were readily  
120 appreciable following two passages of selection with penicillin. These uncloned transformants  
121 formed a similar number of notably smaller inclusions after ATC treatment (Fig. S2). We  
122 proceeded by generating clonal populations, of which one was subject to Western blotting to  
123 confirmed successful overexpression after ATC treatment. Both anti-GrgA and anti-His-tag  
124 antibodies were able to individually detect recombinant His-tagged GrgA (Fig. S3).

125 To further characterize the apparent effects of GrgA overexpression on chlamydial growth  
126 and development, we initiated ATC treatment of the clonal population analyzed in Fig. S3 at one  
127 of four time points: 0, 8, 18 and 24 h post-inoculation (hpi). We harvested one set of cultures at 30  
128 hpi and quantified their yield of progeny EBs. Images were acquired for another set of cultures at  
129 36 hpi. The control vector-transformed CtL2 showed no difference in the EB production between  
130 the non-induce and induced cultures (Fig. 1A). This finding was corroborated by a lack of  
131 difference in the number, size, and RFP intensity of inclusions (Figs. 1B, S4A-C). The GrgA-  
132 transformed CtL2 produced a statistically significant lower number of EBs when ATC induction  
133 occurred between 0 and 18 hpi (Fig. 1C). Although a decrease in EB yield was not observed when  
134 ATC induction was conducted at 24 hpi (Fig. 1C), direct imaging of all conditions at 35 hpi did  
135 reveal reduced inclusion area and RFP intensity for the 24 hpi condition (Figs. 1D, S4D-F). These  
136 findings indicate that delicate regulation of physiological GrgA concentrations during the first 18  
137 h is critical for adequate CtL2 development and growth.

138 **Deletion of  $\sigma^{66}$ -binding domain from GrgA fully eliminates overexpression-induced**  
139 **inhibition while deletion of  $\sigma^{28}$ -binding domain only partially reverses**

140 Our previous *in vitro* studies showed that GrgA activates both  $\sigma^{66}$ -dependent and  $\sigma^{28}$ -dependent  
141 transcription. GrgA binds  $\sigma^{66}$  and  $\sigma^{28}$  at residues 1-64 and 138-165, respectively (35, 36) (Fig. 2A).  
142 We constructed GrgA expression vectors that lack these regions to understand how each  $\sigma$  factor  
143 might contribute to chlamydial inhibition following GrgA overexpression, if at all. Expression of  
144 these GrgA deletion mutants in clonal populations of transformants was then detected by western  
145 blotting (Fig. S5). In contrast to full-length GrgA overexpression (Figs. 1, S4),  $\Delta$ 1-64 GrgA  
146 overexpression showed no adverse effects on chlamydial growth (Figs. 2B-C, S6A-C).  $\Delta$ 138-165  
147 GrgA overexpression reduced progeny EB production when ATC was added at 0, 8, and 18 hpi,  
148 albeit by magnitudes about 10-fold less than what was previously observed after full-length GrgA  
149 overexpression (Fig. 2D-E).  $\Delta$ 138-165 GrgA overexpression decreased the inclusion size and RFP  
150 intensity only at 0 hpi (Figs. 2D-E, S6D-F). These findings indicate that interaction with  $\sigma^{66}$  is  
151 absolutely required for GrgA overexpression-induced inhibition, whereas interaction with  $\sigma^{28}$  also  
152 plays a significant role.

153 **GrgA overexpression inhibits RB replication and volume expansion in a  $\sigma^{66}$ -binding**  
154 **domain-dependent manner**

155 We further performed TEM for ATC-treated GrgA transformants from 8 to 14 hpi. This analysis  
156 revealed a statistically significant 16% decrease in RB size in the ATC-treated cultures (Figs. 4A,  
157 4B). This finding implies that GrgA overexpression not only impacts the EB-to-RB differentiation  
158 process, but also impedes RB volume expansion after division.

159 We employed quantitative confocal microscopy to investigate the effect of GrgA  
160 overexpression on RB proliferation. In cells infected with control vector transformants, ATC

161 treatment did not affect the number of RBs per inclusion. In cells infected with GrgA  
162 transformants, ATC treatment during the period of 8 to 14 hpi caused a 50% reduction in the  
163 number of RBs per inclusion when compared to non-treated control cultures (Fig. 3C, D).  
164 Successive quantitative PCR (qPCR) analysis was conducted to corroborate these RB enumeration  
165 data. In GrgA transformants, a significant reduction in genome copy number was readily detected  
166 2 h after ATC induction, which became progressively severe in following hours (Fig. 3E).  
167 Together, we infer from the findings presented in Fig. 3 that RB proliferation is inhibited by GrgA  
168 overexpression. Furthermore, confocal microscopy analyses (Fig. S7) of GrgA deletion mutants  
169 also demonstrate that the inhibition of RB proliferation is highly dependent on the ability of GrgA  
170 to interact with  $\sigma^{66}$ , and less dependent on its ability to interact with  $\sigma^{28}$ . These results are consistent  
171 with cellular growth data presented in Figs. 2, S6.

### 172 **GrgA overexpression-mediated global transcriptomic changes include upregulated** 173 **Euo, HrcA, and PmpI expression and decreased tRNA expression**

174 We performed RNA-seq analyses to determine the molecular mechanism underlying GrgA  
175 overexpression-induced growth inhibition. Since few chlamydial RNA-seq studies with unpurified  
176 organisms existed in the literature at the time, our pilot RNA-seq experiments were conducted to  
177 optimize the timing of ATC induction and sample harvesting. GrgA transformants were treated  
178 with or without ATC within two time periods: 12 to 16 hpi and 17 to 21 hpi (Table S1, S2). As  
179 expected, the mapping rates of samples prepared at 16 hpi were more than 3-fold lower than the  
180 rates of those prepared at 21 hpi (Table S3). With the exception of rRNAs, which were depleted  
181 prior to library preparation, RNAs of all chlamydial genes could be detected at 16 hpi despite this  
182 notable decrease. In both sets of experiments, mRNA reads of two transcription repressors Euo  
183 and HrcA were noticeably increased in ATC-induced cultures. For the 12 to 16 hpi induction, Euo



184 and HrcA reads increased by 3.1 and 2.8 fold, respectively. For the 17 to 21 hpi induction, they  
185 increased by 3.1 and 1.9 fold, respectively.

186 Subsequent RNA-seq studies were conducted with samples harvested at 16 hpi. This time  
187 point corresponds to the mid-log phase of RB replication, whose regulatory mechanisms are most  
188 interesting to us. We repeated RNA-seq analyses with ATC-treated biological replicates for the 12  
189 to 16 hpi time period to generate statistic power. Consistent with our previous two RNA-seq  
190 studies, mRNA reads of both *Euo* and *HrcA* increased by a statistically significant level in response  
191 to ATC treatment. *Euo* increased by 3.3-fold, second only to the ATC-induced increase in *GrgA*  
192 mRNA reads. *HrcA* increased 2.1-fold, the 5th largest increase. RNA reads of 89 other genes also  
193 increased significantly (i.e.,  $P < 0.05$ ), whereas those of the remaining 86 genes were significantly  
194 decreased (Table S4). Of the 86 genes with significantly downregulated RNAs, 33 were tRNA  
195 genes. Only 4 of the 37 tRNAs were not significantly downregulated (Table S5). Retrospective  
196 analyses showed that numerous tRNAs were also downregulated in previous RNA-seq studies (31  
197 tRNAs in the experiment with ATC treatment from 12 to 16 hpi; 8 tRNAs in the experiment with  
198 ATC treatment from 17 to 21 hpi).

### 199 **Activation of *euo* and *hrcA* but not *pmpI* depends on $\sigma^{66}$ -binding of *GrgA***

200 To determine the contribution of *GrgA* overexpression-induced transcriptomic changes to  
201 chlamydial growth defects in *GrgA* transformants, we performed RNA-seq for CtL2 transformants  
202 of  $\Delta 1-64$  *GrgA* and  $\Delta 138-165$  *GrgA* with and without ATC treatment between 12 and 16 hpi  
203 (Tables S6, S7). In ATC-treated  $\Delta 1-64$  *GrgA* transformants, induction of only a single gene was  
204 statistically significant while repression of four genes was statistically significant. In ATC-treated  
205  $\Delta 138-165$  *GrgA* transformants, the numbers of activated and repressed genes were both higher  
206 than those of ATC-treated full-length *GrgA* transformants. The sole gene activated by  $\Delta 1-64$  *GrgA*

207 overexpression was PmpI, which was also activated by overexpression of both full-length GrgA  
208 and  $\Delta$ 138-165 GrgA. Noticeably, PmpI mRNA increased after full-length GrgA overexpression  
209 (253%) and  $\Delta$ 1-64 GrgA overexpression (270%) by almost the same magnitude. These increases  
210 were significantly higher than the 40% increase observed after  $\Delta$ 138-165 GrgA overexpression.

211 55 genes were induced by both full-length GrgA overexpression and  $\Delta$ 138-165 GrgA  
212 overexpression (Fig. 4A, Table S8). 2 of the 4 genes repressed by  $\Delta$ 1-64 GrgA were also repressed  
213 by both full-length GrgA and  $\Delta$ 138-165 GrgA overexpression. The third  $\Delta$ 1-64 GrgA-repressed  
214 gene was also repressed by full-length GrgA. In total, 45 genes were induced by both full-length  
215 GrgA overexpression and  $\Delta$ 138-165 GrgA overexpression (Fig. 4B). Of these 45 genes, 28 encode  
216 tRNAs (Table S9).

217 Taken together, comparative transcriptomic analyses suggest that nearly all transcriptomic  
218 changes (including activation of *euo* and *hrcA* but *pmpI*) induced by GrgA depend on GrgA  
219 binding of  $\sigma^{66}$ . By contrast, fewer changes depend on GrgA binding of  $\sigma^{28}$ . However,  
220 overexpression of the  $\sigma^{28}$ -binding defective  $\Delta$ 138-165 GrgA may induce additional transcriptomic  
221 changes not seen with full length GrgA overexpression.

## 222 ***euo* and *hrcA* among genes activated immediately following GrgA overexpression**

223 To identify genes directly targeted by GrgA, we determined changes in transcriptomic kinetics by  
224 extracting RNA at 16 hpi from non-induced cultures and cultures treated with ATC for 0.5, 1 and  
225 2 h and (see Fig. S8 for experimental design). Results of RNA-seq reads are presented in Table  
226 S10; expression levels normalized with values of the transcriptome fragments per kilobase per  
227 million reads mapped (FPKM) are presented in Table S11. The entire transcriptome can be divided  
228 into 6 groups based on changes in the expression kinetics of individual genes (Fig. 5, Table S12).  
229 Group A contains 6 genes whose mRNAs increased by 0.5 h (Fig. 5A), although the increase was

230 statistically significant for only four of the six mRNAs. The four statistically significantly  
231 increased mRNAs were those of *Euo*, *PmpI* [a polymorphic protein in the outer membrane and  
232 putative virulence gene (39, 40)], *AroC* (chorismate synthase, which is involved in aromatic amino  
233 acid biosynthesis), and *LplA* (lipoate protein ligase A) (Fig. 5A). These 6 genes are likely primary  
234 targets of GrgA. mRNAs of 175 genes, including *hrcA*, increased by 1 h (Fig. 5B). These large  
235 group of genes may be secondary or indirect targets of GrgA. mRNAs of 444 genes remained  
236 relatively constant (Fig. 5C) and are therefore unlikely targets of GrgA. mRNA levels of remaining  
237 genes decreased to various degrees (Fig. 5D-F), likely in response to expression changes of the  
238 primary and/or secondary targets.

239         Among the six putative “early” genes induced by GrgA (Fig. 5A, Table S12), *euo*, *pmpI*,  
240 *ctl0758* and *ctl0418* are found in single-gene units (Fig. 6A), whereas *lplA* and *aroC* in operons.  
241 Based on the genome topology (7, 41), and results of genome-wide transcription start site analyses  
242 (42), *lplA* shares a promoter with *ctl0536* (Fig. 6B), whereas *aroC* is cotranscribed with 3 other  
243 genes (Fig. 6C). Noticeably, cotranscribed mRNA reads did not increase as the reads of *LplA* and  
244 *AroC* mRNAs increased. To validate the RNA-seq data, we performed reverse transcription  
245 quantitative PCR (RT-qPCR). Among the four singly transcribed mRNAs, these analyses showed  
246 *Euo* and *PmpI* readily increased by about 2- and 3-fold, respectively, at 10 min after induction,  
247 and more than 3- and 4-fold, respectively, at 30 min (Fig. 1A). Smaller but significant increases  
248 were detected for the mRNA of *ctl0758* from 10-30 min (Fig. 6A). However, a significant (57%)  
249 increase in *ctl0418* was not detected until 30 min (Fig. 6A).

250         For the two operon genes (*lplA* and *aroC*), we included a transcription partner in our RT-  
251 qPCR analyses. mRNA expression trends of both *LplA* and its partner *CTL0536* were similar to  
252 those of *Euo* and *PmpI* (Fig. 6B) with significant increases starting at 10 min. Trending increases

253 were also found for the mRNAs of AroC and its transcription partner AroB (Fig. 6C). These results  
254 validate *lplA* and *aroC* as early genes induced by GrgA. However, failure of RNA-seq analysis to  
255 detect increased mRNAs of their transcription partners at 30 min indicate that our RNA-seq was  
256 not as sensitive as RT-qPCR.

257 The apparent higher detection sensitivity of RT-qPCR prompted its use to determine  
258 whether any additional genes whose mRNA reads increased at 1 h may actually be increased at 30  
259 min as well. Our criteria for selection were 1) a read increase with  $P < 0.05$ , and 2) at least one  
260 fragments per kilobase per million reads mapped (FPKM) being  $>900$  for induced samples. As an  
261 exception, because HrcA is an important TF, its mRNA was also analyzed using RT-qPCR even  
262 though the FPKM values were only 445, 329 and 334 in ATC-induced samples. RT-qPCR analysis  
263 detected apparently increased levels for all mRNAs analyzed; however, only the increases in the  
264 mRNAs of MurE (UDP-N-acetylmuramoyl-L-alanyl-D-glutamate-2,6-diaminopimelate ligase in  
265 the peptidoglycan synthesis pathway) and HrcA were statistically significant ( $P < 0.05$ ) (Fig. S12).  
266 Further analysis confirmed that MurE mRNA increased at 30 min but not 10 or 20 min after ATC  
267 induction (Fig. 6D), but HrcA mRNA readily increased at even 10 min (Fig. 6E). *hrcA* is in an  
268 operon with two transcription partners *grpE* (which encodes heat shock protein-70 cofactor) and  
269 *dnaK* (a protein chaperone gene) although *dnaK* has an additional promoter. Similar to the HrcA  
270 mRNA, the mRNAs of GrpE and DnaK showed similar increases starting 10 min (Fig. 6E). Taken  
271 together, results presented in Fig. 6, S9 demonstrate that 5 genes (*euo*, *pmpI*, *murE*, *ctl0418* and  
272 *ctl0758*), which are in single-gene transcription units, and 9 additional genes in 3 operons are  
273 activated by 10 to 30 min induction of GrgA overexpression. Most likely, these 14 genes comprise  
274 GrgA's direct regulon.

275 **GrgA stimulates transcription from *euo*, *hrcA* and *pmpI* promoters**

276 Sequence analyses identified putative  $\sigma^{66}$  promoter elements in at least 5 of the 8 GrgA-regulated  
277 promoters and revealed that *pmpI* appears to carry additional  $\sigma^{28}$  promoter elements (Fig. S10).  
278 We constructed four transcription reporter plasmids, of which three carried a putative  $\sigma^{66}$  promoter  
279 of *euo*, *hrcA*, or *pmpI*. The remaining reporter plasmid carried the putative  $\sigma^{28}$  promoter of *pmpI*.  
280 Of these four constructed plasmids, all were able to successfully direct RNA synthesis except for  
281 the one carrying a putative  $\sigma^{66}$  promoter of *pmpI*. This suggests the cloned promoter fragment is  
282 nonfunctional. Among the other three plasmids, an increased number of transcripts were detected  
283 in the presence of GrgA (Fig. 7) indicating that GrgA activates transcription not only from the  $\sigma^{66}$   
284 promoters of *euo* and *hrcA* (i.e., PdnaK2), but also from the  $\sigma^{28}$  promoter of *pmpI*.

285 **Overexpression of either *Euo* or *HrcA* inhibits chlamydial growth**

286 To determine the contributions of upregulated *Euo* and *HrcA* expression to GrgA overexpression-  
287 induced growth inhibition, we constructed ATC-inducible *Euo* and *HrcA* expression plasmids  
288 (Table S9) and generated CtL2 transformants thereafter. 10 nM ATC-induced overexpression of  
289 both *Euo* and *HrcA* following treatment at 0, 8, and 18 hpi caused severe to moderate growth  
290 inhibition; these effects were minimal after treatment at 24 hpi (Fig. 8). These results are similar  
291 to our earlier observations made following ATC-induced GrgA overexpression (Fig. 1). Next, we  
292 used lower ATC concentrations to induce 2- to 3-fold increases in the mRNAs of *Euo* and *HrcA*,  
293 which were comparable to their magnitudes of increase induced by ATC in GrgA transformants  
294 (Table S1, S2, S4). Noticeably, low ATC concentrations were also sufficient to cause growth  
295 inhibition (Fig. S11). These data support the notion that increased *Euo* and *HrcA* expression  
296 mediate GrgA overexpression-induced CtL2 growth.

## 297 **Identification of genes commonly regulated by GrgA, Euo and HrcA**

298 We performed RNA-seq analyses to identify transcriptomic changes in Euo and HrcA  
299 transformants following ATC-induction between 12 and 16 hpi (Tables S13, S14). By comparing  
300 these two RNA-seq datasets with the RNA-seq dataset obtained from the GrgA transformant  
301 (Table S4), we identified the genes that are commonly regulated by GrgA, Euo, and HrcA (Fig.  
302 9). Whereas 9 genes were commonly activated (Fig. 9A, B) in all three transformants upon ATC  
303 treatment, 11 genes were commonly repressed (Fig. 9C, D). Genes that are commonly activated or  
304 repressed in two transformants as well as in all three transformants are listed in Tables S15, S16.  
305 Noticeably, 4 of the 9 genes that are commonly activated in all three transformants encode proteins  
306 involved in DNA replication, whereas the remaining 5 commonly activated genes encode proteins  
307 with various functions (Fig. 9B). Only 6 of the 11 genes commonly repressed in all three  
308 transformants following ATC treatment encode functionally known proteins. Three (PPA, IspH  
309 and FabI) catalyze metabolic reactions while the other three either constitute a protein translocase  
310 (YajC) or serve as secretion effectors (CTL0874 CTL0887) (Fig. 9D). These commonly activated  
311 and repressed genes may serve as upstream regulators of RB growth and proliferation or their  
312 expression levels are controlled consequent to growth inhibition.

## 313 **GrgA-controlled transcriptional network**

314 Using RNA-seq data (Tables S10) and RT-qPCR data (Figs. 6, S9) obtained from GrgA  
315 transformants, we elucidated a GrgA-regulated transcriptional network 30 min, 1 h, and 2 h after  
316 ATC treatment. Within 30 minutes of ATC treatment, GrgA activated expression of 12 molecules  
317 including the TFs Euo and HrcA, and repressed expression of two genes (*trpB* and *ctl0887*) (Fig.  
318 10A). As will be discussed, the repression is likely an indirect effect of GrgA overexpression.

319           Large numbers of additional genes were activated and repressed at 1 h and 2 h after ATC  
320 treatment in GrgA transformants. The products of these genes can be classified into at least 16  
321 clusters (Fig. S12). Overall, the networks at these two points are similar with only one major  
322 difference: 14 versus 4 downregulated tRNAs. Given the fact that 30 tRNA are downregulated at  
323 4 h (Fig. 10B), we suspect that our RNA-seq samples for these two time points have inadvertently  
324 been switched around.

325           We developed the 4 h network by analyzing RNA-seq data obtained from not only GrgA  
326 transformants (Table S5), but also Euo and HrcA transformants (Tables 13, 14) to show how Euo  
327 and/or HrcA may mediate some of the transcriptomic changes in GrgA transformants induced with  
328 ATC. A still version of the network is presented in Fig. 10B, whereas an interactive version is  
329 provided as online supporting information (Fig. S13). The most striking event in this network is  
330 the downregulation of 30 tRNAs. Of these 30 tRNAs in GrgA transformants treated with ATC, 6  
331 were also downregulated in the Euo transformants treated with ATC, suggesting the possibility  
332 that Euo may mediate tRNA expression in response to GrgA. However, 2 tRNAs downregulated  
333 by GrgA overexpression were also upregulated by Euo overexpression.

334           Other than tRNAs, there are slightly more genes in gene categories whose expression were  
335 changed by GrgA overexpression, compared with the networks developed for 1 h and 2 h (Fig.  
336 S13). RNA-seq data is consistent with the above-stated notion that while activating both Euo and  
337 HrcA expression, GrgA is repressed by both Euo and HrcA. Euo is in turn also repressed by HrcA.  
338 However, HrcA mRNA is significantly increased in Euo transformants treated with ATC for 4 h,  
339 suggesting that the long-term overall effect of Euo overexpression leads to increased HrcA  
340 expression even though it briefly downregulated HrcA expression at 15 min (Fig. S12B).

341 To recapitulate, our results presented above reveal pathways through which GrgA  
342 overexpression causes chlamydial growth inhibition via Euo- and HrcA-dependent and  
343 independent transcriptomic modulation.

## 344 **DISCUSSION**

345 In this report, we determined the effects of GrgA overexpression on chlamydial growth and  
346 transcriptomic expression through experimentation with full-length GrgA and GrgA deletion  
347 mutants. We identified direct and indirect regulons of GrgA, and uncovered a TRN that  
348 encompasses GrgA, Euo, and HrcA. We further documented the inhibitory effects of Euo and  
349 HrcA overexpression on chlamydial growth and transcriptomic expression. Our findings have  
350 important implications for progression of the chlamydial developmental cycle.

### 351 **The direct and indirect regulons of GrgA**

352 Our RNA-seq and RT-qPCR analyses revealed the direct and indirect regulons of GrgA by  
353 detecting time-dependent transcriptomic changes following ATC-induced GrgA overexpression.  
354 The direct regulon includes 12 genes that are activated within 10 to 30 min of ATC treatment (Figs.  
355 6, S9; Tables S10, S11). mRNAs of the *C. trachomatis* L2b strain (a variant of CtL2) have an  
356 average half-life of only 15 min (43). While this short half-life suggests 10 to 30 min of ATC  
357 treatment is adequate to identify most activated and repressed genes, a longer treatment duration  
358 may be required to detect changes in RNAs with extraordinarily long half-lives. Therefore, it is  
359 possible that we have not identified all direct targets of GrgA.

360 Several lines of evidence presented in this report affirm that GrgA activates both  $\sigma^{66}$ - and  
361  $\sigma^{28}$ -dependent promoters through direct interactions with  $\sigma^{66}$  and  $\sigma^{28}$ , a notion drawn from our  
362 previous *in vitro* studies (35-37). Overexpression of the  $\sigma^{66}$ -binding-defective  $\Delta 1$ -64 GrgA did not  
363 affect chlamydial growth, whereas full-length GrgA overexpression induced severe growth



364 inhibition. Overexpression of the  $\sigma^{28}$ -binding-defective  $\Delta 138$ -165 GrgA caused mild growth  
365 inhibition, albeit by a magnitude much less than that caused by full-length GrgA overexpression.  
366 Additionally, full-length GrgA overexpression caused numerous transcriptomic changes while  $\Delta 1$ -  
367 64 GrgA overexpression caused only a small increase in PmpI mRNA. Furthermore, among 8  
368 promoter regions upstream of the 4 single-gene units and 4 operons activated within 10 to 30 min  
369 of ATC induction of GrgA, 5 have conserved  $\sigma^{66}$ -dependent promoter elements and 1 has  
370 recognizable  $\sigma^{28}$ -dependent promoter elements (Fig. 6, S10). Finally, the transcription activities of  
371 two of the  $\sigma^{66}$ -dependent promoters (Euo and HrcA) and the  $\sigma^{28}$ -dependent *pmpI* promoter are  
372 stimulated by GrgA *in vitro*.

373 Two genes (*trpB* and *ctl0887*) are downregulated 30 min after ATC treatment (Fig. 10 &  
374 Tables S10, S11). These genes are likely subjects to indirect rather than direct repression by GrgA.  
375 Neighboring genes encoded by different DNA strands can be activated or repressed by a bacterial  
376 TF if they share an intergenic promoter region (44). Because *trpB* and *ctl0887* are located far from  
377 any GrgA-activated genes, the opportunity for direct repression is unlikely. Indeed, RNA-seq data  
378 from HrcA and Euo transformants suggest that GrgA downregulates *trpB* expression indirectly  
379 through HrcA, and downregulates *ctl0887* expression through Euo and/or HrcA. Nonetheless, we  
380 cannot completely rule out the possibility that GrgA acts as a repressor since dual functional TFs  
381 have been identified in other bacteria (45).

382 Excluding the 12 direct target genes induced by 30 min, we consider all genes whose RNA  
383 levels significantly increased or decreased between 1 h and 4 h as constituents of the indirect  
384 regulon of GrgA. Because GrgA is an activator of *euo* and *hrcA*, it is not surprising that the indirect  
385 regulon is much larger than the direct regulon. Nearly 150 target genes were identified by 4 h when  
386 an arbitrary threshold of 33% change was applied. This approximation likely underestimates the

387 true size of the regulon. As discussed above, physiological targets that show a percent change less  
388 than 33% are excluded. Furthermore, the fact that GrgA overexpression results in reduced RB  
389 replication suggests that the numbers of RNA reads should be normalized with the genome copy  
390 for cultures subjected to long ATC treatment (e.g., 2 to 4 h). However, there is no proper way to  
391 perform normalization because the RNA samples undergo procedures of host and bacterial rRNA  
392 removal and polyadenylated mRNA removal before library construction (47). Thus, we likely have  
393 underestimated the number of activated genes and the degrees of their activation, and at the same  
394 time overestimated the number of downregulated genes and the degrees of their downregulation.

### 395 **Chlamydial growth and development controlled by GrgA-directed TRN**

396 Activation of *euo* and *hrcA* transcription by GrgA and the expression profiles of the three TFs  
397 indicate that GrgA serves multiple roles in the chlamydial cycle. *Euo* was initially identified as an  
398 immediate early gene in *Chlamydia psittaci* (33). Microarray studies confirmed that *euo* is  
399 immediately transcribed *C. trachomatis* EBs enter host cells (8, 9). Microarray detected GrgA  
400 mRNA from 8 hpi through 40 hpi (8). Our own expression analysis using western blotting (35)  
401 and work by Skipp et al. using quantitative proteomics (48) both detected high levels of GrgA in  
402 both EBs and RBs. Furthermore, protein mass spectrometry carried out by Saka et al. also detected  
403 GrgA in EBs although they failed to observe GrgA in RBs (49). We speculate that the GrgA protein  
404 prepicked into EBs plays a critical role in activation of *euo* transcription immediately following  
405 host cell entry. The *Euo* protein functions as a master repressor of late genes (11-13). By binding  
406 to the promoters of late genes and repressing their expression, EBs can utilize limited resources to  
407 express early genes required for converting themselves into proliferative RBs.

408 We believe that GrgA is also a physiological activator of *hrcA* transcription starting 24 hpi  
409 (8, 9). *HrcA* is known as a heat-inducible TF in bacteria (50). However, *C. trachomatis* infection

410 seldom induces fever in infected humans. Its cyclic expression takes place *C. trachomatis* cultured  
411 at 37 °C (8, 9), a point at which RBs start to convert back to infectious EBs. Thus, HrcA either  
412 plays an active role in the redifferentiation by repressing its target genes or by keeping them silent  
413 in EBs. Consistent with this interpretation, there are examples that HrcA controls cell cycle-  
414 dependent protein expression in bacteria at normal growth temperature and plays only a minor role  
415 in heat shock response (51, 52).

416 A question arises as to why GrgA would not activate *hrcA* when it activates *euo*. GrgA  
417 could have differential affinity for the promoters of *euo* and *hrcA* *in vivo*, as promoter hierarchy is  
418 common among TF regulons (44). In addition, the chromatin configuration, which can  
419 significantly influence transcription, differs drastically in EBs and RBs.

420 How GrgA regulates RB growth during the midcycle is less obvious. Given the large  
421 number of genes in its indirect regulon (Fig. 10), GrgA likely fulfils its function as a growth  
422 regulator through balanced action of its direct and numerous indirect target genes with roles in  
423 biosynthesis, metabolism and other processes. Similarly, many genes (e.g., tRNA genes) regulated  
424 by GrgA may coordinate the transition of RBs to EBs during late developmental stages.

425 We identified 9 commonly activated and 11 commonly repressed genes in GrgA, *Euo*, and  
426 *HrcA* transformants undergoing growth arrest due to ATC-induced overexpression of respective  
427 TFs (Fig. 9; Tables S15, S16). Their dysregulated expression may contribute to or result from  
428 chlamydial growth inhibition. Paradoxically, 4 of the 9 commonly activated genes encode proteins  
429 involved in DNA replication and repair, which include topoisomerase I, DNA polymerase III,  
430 DNA helicase, and a site-specific tyrosine recombinase (*XerD*). Interestingly, all these four genes  
431 are also upregulated during interferon- $\gamma$ -induced chlamydial persistence when growth is also  
432 reduced. In addition, *Euo* and mRNA of CT505, transcription partner of GrgA, are increased under

433 the condition (53). Thus, GrgA and Euo likely regulate chlamydial persistence, which can be  
434 induced by cytokines and antibiotic treatment (53-55).

435 The fifth commonly activated gene *pknD* encodes a protein kinase (56, 57). It is known  
436 that inhibition of either PknD or a chlamydial phosphatase PP2C that dephosphorylates PknD can  
437 impede chlamydial growth (58, 59). Given the importance of the balance between protein  
438 phosphorylation and dephosphorylation, increased PknD expression likely contributes to  
439 chlamydial growth inhibition. It is not apparent how increased expression of four remaining  
440 commonly activated genes, *hemD*, *gluM*, *ctl 0466* and *ctl0238b* contributes to growth inhibition.

441 6 of the 11 genes commonly repressed by GrgA, Euo, and HrcA overexpression encode  
442 functionally known proteins whose dysregulation may negatively affect chlamydial growth. The  
443 *ppa*-encoded enzyme is required for enterobacterial DNA replication (60). The enzyme encoded  
444 by *ispH* produces isopentyl diphosphate. The isoprenoid is a precursor of peptidoglycan (54, 61,  
445 62). In addition to inhibited peptidoglycan synthesis, downregulated IspH may lead to isoprenoid  
446 precursor accumulation, which may alter chlamydial gene expression through regulating the  
447 interaction of histone with DNA (63, 64). The product of *fabI* is a key enzyme required for  
448 chlamydial growth that acts in the type II fatty acid synthesis system (65). The product of *yajC* is  
449 a constituent of the preprotein translocase, which is required for protein export across the inner  
450 membrane, an essential function in Gram-negative bacteria (66). CADD interacts with death  
451 receptors on the host cells (67, 68), and may facilitate EB release by inducing host cell death in a  
452 late developmental stage. Finally, CTL0887 is a member of the chlamydial outer membrane  
453 complex (69, 70). Although the exact function of CTL0887 remains unknown, the complex is  
454 required for maintaining the integrity of the bacterium.

455 Numerous tRNAs are downregulated following GrgA overexpression (Table S5; Fig. 10),  
456 which would contribute to growth inhibition. A smaller number of tRNAs are also downregulated  
457 following Euo overexpression (Fig. 10; Tables S13, S16). Other bacteria downregulate tRNA  
458 transcription in response to nutrient deprivation (71, 72). This stringent response phenomenon is  
459 mediated by (p)ppGpp, a protein produced only during starvation that acts directly on the RNAP  
460 holoenzyme to reprogram transcription. *Chlamydia* lacks the capacity to synthesize (p)ppGpp  
461 however (7, 41). It is likely that chlamydial tRNA expression is temporarily delayed in the  
462 immediate early stage and later downregulated as RBs converts to EBs.

463 In summary, we have identified at least 12 genes that are direct targets of GrgA, the newest  
464 transcription factor in *Chlamydia*. By activating expression of two major transcription factors, Euo  
465 and HrcA, and by regulating expression of numerous additional genes with functions in almost all  
466 cellular processes, GrgA acts as a master transcription regulator that controls chlamydial growth  
467 and development. It may also regulate chlamydial persistence, an important clinical phenomenon.  
468 Hopefully, an efficient gene-silencing technology not only applicable to nonessential genes but  
469 also essential genes will soon be developed to illuminate the precise roles of GrgA in chlamydial  
470 physiology (73).

## 471 **MATERIALS AND METHODS**

### 472 **Plasmids**

473 Plasmids used for this study are listed in Table S18. Primers used to amplify fragments are listed  
474 in Table S19. All primers were custom synthesized at Sigma. pGFP::SW2-GrgA (Fig. S1) was  
475 constructed by fusing a PCR-amplified full-length GrgA fragment with *SalI*-cut pGFP::SW2 (38).  
476 The GrgA fragment was amplified by *PfuUltra* DNA Polymerase (Agilent, Cat. # 600380).

477 Fusion was performed with the Cold Fusion Cloning Kit (SBI System Biosciences, Cat.  
478 #MC010B-1).

479 pTRL2-NH-GrgA (Fig. S1) was constructed using the Cold Fusion Cloning Kit to combine  
480 two DNA fragments. Fragment 1, also termed fragment TRL2( $\Delta$ gfp), was amplified by the  
481 *PfuUltra* DNA polymerase using pASK-GFP-L2-mkate2 (74) as the template. Fragment 2  
482 encoded NH-GrgA and was amplified by the same enzyme with pET21a-NH-GrgA as the  
483 template. pTRL2-GrgA $\Delta$ 1-64 and pTRL2-NH-GrgA $\Delta$ 138-165 were constructed using the  
484 QuickChange II Site-directed Mutagenesis Kit to delete DNA sequences from a pTRL2-NH-GrgA  
485 template that encode amino acid regions 1-64 and 138-165.

486 Fragment amplification for constructing remaining plasmids was performed using Q5 high-  
487 fidelity DNA polymerase (NEB, Cat. # M0491). A TRL2( $\Delta$ gfp)-NH fragment was amplified using  
488 pTRL2-NH-GrgA as template. The *Euo* and *HrcA* encoding fragment was amplified by using CtL2  
489 genomic DNA as the template, and were fused to fragment TRL2( $\Delta$ gfp)-NH using the NEBuilder  
490 HiFi DNA Assembly Cloning kit (NEBuilder, NEB, Cat. #M0491) to create plasmids pTRL2-NH-  
491 EUO and pTRL2-NH-HrcA, respectively.

492 An *euo* promoter fragment and an *hrcA* promoter fragment (Supplemental sDoc1) were  
493 amplified using CtL2 genomic DNA as templates, and were fused to vector fragments using  
494 NEBuilder to create pMT1125-Peuo and pMT1125-PhrcA, respectively. Promoter fragments were  
495 amplified using pMT1125 (75) as template.

496 pMT1125-PpmpI( $\sigma^{28}$ ) and pMT1125-PpmpI( $\sigma^{66}$ ) were constructed in two steps. First, the  
497 putative  $\sigma^{28}$ -dependent and  $\sigma^{66}$ -dependent promoter fragments (Supplemental sDoc1) were  
498 amplified using CtL2 genomic DNA as the templates. Resultant DNA fragments were digested  
499 with *Xba*I and *EcoRV* and ligated to *Xba*I/*EcoRV*-digested pMT1125 using T4 DNA ligase.

500 Second, the quinine nucleotide inside the *EcoRV* site was deleted using Q5 site-directed  
501 mutagenesis kit (Cat. #E0554S).

502 Plasmids constructed were subject to Sanger sequencing at Genscript or Psomogen to  
503 ensure sequence authenticity. For chlamydial expression vectors, sequencing analysis also covered  
504 the CtL2-encoded genes and additional applicable elements (i.e., the Pnm promoter, EGFP-Cat  
505 gene, ATC-inducible promoter, and/or tet repressor-coding sequence), in addition to the coding  
506 sequences of TFs or their deletion mutants. Promoter fragments and the reporter cassette in  
507 pMT1125-derived vectors were sequenced.

### 508 **CtL2 strains**

509 Wild-type CtL2 (strain 434/BU) was purchased from ATCC (76). EBs were purified from L929  
510 cells via MD-76 gradient ultracentrifugation as described previously (77). Titers of EB stocks were  
511 determined as follows. L929 cells grown on 96-well plates were infected by centrifugation for 20  
512 minutes at  $900 \times g$ . These infected cells were then fixed with cold methanol at 30 hours post-  
513 inoculation (hpi) and stained successively with two antibodies: a monoclonal L21-5 anti-major  
514 outer membrane protein antibody (78) and an FITC-conjugated rabbit anti-mouse antibody (79).  
515 Transformation was performed as described (80) with modifications (81).  $1.3 \times 10^7$  IFUs of EBs  
516 were mixed with 4-6  $\mu\text{g}$  of plasmid DNA in 50  $\mu\text{l}$   $\text{CaCl}_2$  buffer (10 mM Tris, pH 7.4 and 50 mM  
517  $\text{CaCl}_2$ ) and incubated for 30 minutes at room temperature. The mixture was then diluted with 1.2  
518 mL Hanks Balanced Salt Solution (HBSS; Sigma, Cat. # D8622) and used to inoculate a 6-well  
519 plate of nearly confluent L929 cells (i.e.,  $\sim 0.2$  ml of the suspension per well). Monolayers were  
520 infected at room temperature by centrifugation for 20 minutes at  $900 \times g$ , after which HBSS was  
521 replaced with DMEM containing 5% FBS (2 ml/well). Cultures were supplemented with  
522 cycloheximide (final concentrations: 1  $\mu\text{g}/\text{ml}$ ) and penicillin G (final concentration: 2 U/ml). Cells

523 from each well were harvested into 500  $\mu$ l HBSS at 36 hpi, disrupted by brief sonication and  
524 centrifuged for 10 min at 1000  $\times$  g and 4  $^{\circ}$ C. The supernatant was used thereafter to infect a new  
525 well of nearly confluent L929 monolayer on a 6-well plate by centrifugation. Immediately after  
526 infection, medium containing both cycloheximide and penicillin G was added, and the process of  
527 harvesting and infection was repeated. After RFP-expressing inclusions were noted (typically at  
528 the end of passage 2 or 3), the concentration of penicillin G was increased to 4 U/ml for the next  
529 passage and further to 10 U/ml for 2 additional passages. Thereafter, penicillin G was replaced  
530 with 10  $\mu$ g/ml ampicillin for further expansion.

531 To generate transformant clonal populations, 6-well plates of L929 cells were inoculated  
532 with EBs (~1-6 inclusions/well) and cultured using medium with 20  $\mu$ g/ml ampicillin. A P200  
533 micropipette was used to sample one inclusion from each well at 24 to 28 hpi (i.e., 6 total inclusions  
534 were sampled from 6 different wells). Intracellular chlamydiae were released from each sampled  
535 inclusion by sonication for 5 seconds, centrifuged, and subsequently used to inoculate an entirely  
536 new 6-well plate of L929 cells. 6 additional inclusions were picked from a plate with observable  
537 inclusions (typically, only 2-3 of the 6 inoculated wells yielded inclusions). This process was  
538 repeated one more time to ensure homogeneity. For further experimentation, EBs of transformant  
539 clonal populations were prepared and purified as described above. Infectivity of EB stocks were  
540 determined as described, except that RFP-expressing inclusions of CtL2 transformants in live  
541 cultures were scored without immunostaining (73).

#### 542 **Determination of *C. trachomatis* growth**

543 Nearly confluent L929 cell monolayers grown on 24-well (for determining progeny EB  
544 production) and 6-well (for microscopic analysis) plates were infected with MD-76 gradient-  
545 purified CtL2 transformants at a multiplicity of infection (MOI) of 1 IFU per 3 cells. Unless



546 otherwise indicated, expression of GrgA, Euo, and/or HrcA was induced by replacing culture  
547 media with fresh media containing 10 nM ATC. To quantify progeny EB production, cells were  
548 harvested in 500  $\mu$ L SPG buffer at 30 hpi; recoverable IFUs were determined as previously  
549 described (73). RFP-expressing inclusions were imaged at 36 hpi. The Java-based ImageJ software  
550 was then used to process the images. An empiric threshold value was first determined and applied,  
551 after which noise reduction and binarization calculations were performed. The analyze particles  
552 function was then called with minimum size and circularity constraints to compute potential  
553 inclusion boundaries within the given image. Visual inspection was conducted to ensure accurate  
554 particle identification and selection for subsequent intensity measurements.

### 555 **Epi-fluorescence microscopy**

556 L929 cell monolayers grown on 6-well plates were infected with EBs of CtL2 transformants at an  
557 MOI of 1 IFU per 3 cells and incubated with or without 10 nM ATC for 34 to 36 hours. Bright  
558 field and red fluorescent images were acquired on an Olympus IX51 fluorescence microscope  
559 using a constant exposure time for each channel. Image overlay was performed using the  
560 PictureFrame software.

### 561 **Confocal fluorescent microscopy**

562 L929 cell monolayers grown on coverslips were infected with EBs of NH-GrgA transformants at  
563 an MOI of 1 IFU per 5 cells. GrgA expression was induced with 20 nM ATC at 8 hpi. 6 h later,  
564 cells were rinsed with PBS, fixed by incubation in PBS containing 3% formaldehyde, 0.045%  
565 glutaraldehyde for 10 min, washed twice with PBS and permeabilized with 90% cold methanol  
566 (82). Chlamydiae were stained with polyclonal a rabbit anti-tRFP antibody (Evrogen, Cat. # 233),  
567 which recognized the RFP mKate protein, and then FITC-conjugated goat anti-rabbit IgG  
568 secondary antibody (Immunotech). Host cell cytoplasm was stained with 0.01% Evans Blue; host

569 cell chromosomal DNA was stained with 1 µg/mL Hoechst 33342. Cells were imaged using a Zeiss  
570 LSM710 confocal microscope equipped with a 100X Plan-Apochromat oil immersion lens.

### 571 **Electron Microscopy**

572 L929 cell monolayers were infected with GrgA transformants at an MOI of 1 IFU per cell. Cultures  
573 were then treated with or without aTC, collected in PBS containing 10% FBS at 14 hpi, and  
574 centrifuged for 10 minutes at 500 × g. Pelleted cells were resuspended in EM fixation buffer (2.5%  
575 glutaraldehyde, 4% paraformaldehyde, 0.1 M cacodylate buffer) at RT, allowed to incubate for 2  
576 hours, and stored at 4 °C overnight. To prepare samples for imaging, cells were first rinsed in 0.1  
577 M cacodylate buffer, dehydrated in a graded series of ethanol, and then embedded in Eponate 812  
578 resin at 68 °C overnight. 90 nm thin sections were cut on a Leica UC6 microtome and picked up  
579 on a copper grid. Grids were stained with Uranyl acetate followed by Lead Citrate. TIFF images  
580 were acquired on Philips CM12 electron microscope at 80 Kv using AMT XR111 digital camera.  
581 RB diameters were measured using ImageJ software (83).

### 582 **Cellular genomic DNA and RNA isolation**

583 Total host and chlamydial genomic DNA and RNA were isolated from non-infected and  
584 chlamydia-infected L929 cells using TRI reagent (Sigma, Cat. # 93289), which separates DNA  
585 and RNA into different phases. DNA and RNA were purified in accordance with the  
586 manufacturer's instructions (84). Genomic DNA was dissolved in a buffer containing 0.1 M  
587 HEPES and 8 mM NaOH. These samples were stored at -20 °C. RNA was dissolved in DEPC-  
588 treated H<sub>2</sub>O and further treated with RNase-free DNaseI to eliminate residual DNA contamination.  
589 The resultant DNA-free RNA samples were stored at -80 °C.

590 **Quantitative PCR (qPCR) and reverse transcription qPCR (RT-qPCR)**

591 Thermo Fisher QS5 qPCR machine was used for qPCR and RT-qPCR analyses to quantify relative  
592 CtL2 genome copy numbers and mRNA levels, respectively. Genomic qPCR was performed using  
593 Applied Biosystems PowerUp SYBR Green Master Mix (Thermo Fisher Scientific, Cat. #  
594 A25742) following manufacturer's instructions. For each reaction, 5 ng of purified total host and  
595 bacterial genomic DNA was used as template. The primer pair were qPCR-ctl0631-F and qPCR-  
596 ctl0631-R (Table S10). RT-qPCR was performed using Luna Universal One-Step RT-qPCR kit  
597 (NEB, Cat. # E3005E) following manufacturer's instructions. For each reaction, 600 ng of purified  
598 total host and bacterial RNA was used as initial template for cDNA synthesis. All genomic and  
599 RT-qPCR reactions were performed in technical duplicate or triplicate.

600 **RNA sequencing**

601 Total RNA integrity was determined using Fragment Analyzer (Agilent) prior to RNA-seq library  
602 preparation. Illumina MRZE706 Ribo-Zero Gold Epidemiology rRNA Removal kit was used to  
603 remove mouse and chlamydial rRNAs. Oligo(dT) beads were used to remove mouse mRNA.  
604 RNA-seq libraries were prepared using Illumina TruSeq stranded mRNA-seq sample preparation  
605 protocol, subjected to quantification process, pooled for cBot amplification and sequenced with  
606 Illumina HiSeq 3000 platform with 50 bp single-read sequencing module. In average, 20-25  
607 million reads were obtained for each RNA-seq sample. Short read sequences were first aligned to  
608 the CtL2 chromosome (accession # NC\_010287.1) and the transformed plasmids using TopHat2  
609 aligner and then quantified for gene expression by HTSeq to obtain raw read counts per gene, and  
610 then converted to RPKM (Read Per Kilobase of gene length per Million reads of the library) (85-  
611 87).

## 612 **TRN development**

613 Pathway analysis was first performed on significantly regulated gene sets whose P values were <  
614 0.05 by STRING-db v.11 and modified to increase font size, nodes and edges were changed by  
615 color coding. Secondly, add more GrgA-regulated genes pathway (edges) according RNA  
616 sequencing data without altering original network relationships.

## 617 ***In vitro* transcription assay**

618 Chlamydial RNA polymerase holoenzyme was partially purified from RBs of pTRL2 $\Delta$ gfp-  
619 transformed CtL2 using Heparin Agarose (Sigma) as previously described (35). *In vitro*  
620 transcription assays for  $\sigma^{66}$ -dependent promoters and  $\sigma^{28}$ -dependent promoters were performed as  
621 previously described (35, 36).

## 622 **Western Blotting**

623 L929 cells grown on 6-well plates were infected with transformants. Expression induction was  
624 performed at 14 hpi using 10 nM ATC. Cells were harvested in 100  $\mu$ L 1X SDS-PAGE sample  
625 buffer at 15 hpi, heated at 95 °C for 5 min, and sonicated for 1 minute at 35% amplitude (5 second  
626 on, 5 seconds off). Proteins were resolved in 10% SDS-PAGE gels and transferred onto PVDF  
627 membranes. GrgA and mutants were detected using a monoclonal anti-His antibody (Genscript,  
628 Cat. A00186) and a mouse anti-GrgA antibody (35).

## 629 **Statistical analysis**

630 R package DESeq was used to normalize data and find group-pairwise differential gene expression  
631 based on three criteria: Pval < 0.05, average rpkms > 1, and fold change  $\geq$  1. Genes were clustered  
632 into groups based on temporal patterns of transcriptomics using Gaussian mixture models (88).  
633 All other quantitative data were analyzed using *t* tests in Excel of Microsoft Office.

## 634 ACKNOWLEDGEMENTS

635 We thank Dr. Huaye Zhang for assistance with the confocal microscopy, Mr. Rajesh Patel for  
636 assistance with electron microscopy, Dr. Joseph Fondell for discussions. We also thank Dr. P.  
637 Scott Hefty (University of Kansas) for the supply of pASK-GFP/mKate2-L2. This work was  
638 supported by grants from the National Institutes of Health (grant # AI122034 and AI140167 to  
639 HF) and New Jersey Health Foundation (grant # PC20-18 to HF). Genome Sequencing Facility at  
640 UTHSA is supported by NIH-NCI P30 CA054174 (Cancer Center at UT Health San Antonio),  
641 NIH Shared Instrument grant 1S10OD021805-01 (S10 grant), and CPRIT Core Facility Award  
642 (RP160732).

## 643 REFERENCES

- 644
- 645 1. CDC. 2019. Sexually transmitted disease surveillance 2018. Services DoHaH, Atlanta:  
646 U.S. . <https://www.cdc.gov/std/stats18/STDSurveillance2018-full-report.pdf>.
  - 647 2. WHO. 2016. Global health sector strategy on sexually transmitted infections 2016–2021.
  - 648 3. Flueckiger RM, Courtright P, Abdala M, Abdou A, Abdulnafia Z, Al-Khatib TK, Amer  
649 K, Amiel ON, Awoussi S, Bakhtiari A, Batcho W, Bella AL, Bennawi KH, Brooker SJ,  
650 Chu BK, Dejene M, Dezoumbe D, Elshafie BE, Elvis AA, Fabrice DN, Omar FJ, Francois  
651 M, Francois D, Garap J, Gichangi M, Goepogui A, Hammou J, Kadri B, Kabona G, Kabore  
652 M, Kalua K, Kamugisha M, Kebede B, Keita K, Khan AA, Kiflu G, Yibi M, Mackline G,  
653 Macleod C, Manangazira P, Masika MP, Massangaie M, Mduluza T, Meno N, Midzi N,  
654 Minnih AO, Mishra S, Mpyet C, Muraguri N, Mwingira U, et al. 2019. The global burden  
655 of trichiasis in 2016. PLoS Negl Trop Dis 13:e0007835.
  - 656 4. Abdelrahman YM, Belland RJ. 2005. The chlamydial developmental cycle. FEMS  
657 Microbiology Reviews 29:949-59.
  - 658 5. Hybiske K, Stephens RS. 2007. Mechanisms of *Chlamydia trachomatis* entry into  
659 nonphagocytic cells. Infect Immun 75:3925-3934.
  - 660 6. Hybiske K, Stephens RS. 2007. Mechanisms of host cell exit by the intracellular bacterium  
661 *Chlamydia*. Proc Natl Acad Sci USA 104:11430-11435.
  - 662 7. Stephens RS, Kalman S, Lammel C, Fan J, Marathe R, Aravind L, Mitchell W, Olinger L,  
663 Tatusov RL, Zhao Q, Koonin EV, Davis RW. 1998. Genome sequence of an obligate  
664 intracellular pathogen of humans: *Chlamydia trachomatis*. Science 282:754-9.
  - 665 8. Belland RJ, Zhong G, Crane DD, Hogan D, Sturdevant D, Sharma J, Beatty WL, Caldwell  
666 HD. 2003. Genomic transcriptional profiling of the developmental cycle of *Chlamydia*  
667 *trachomatis*. Proc Natl Acad Sci USA 100:8478-83.

- 668 9. Nicholson TL, Olinger L, Chong K, Schoolnik G, Stephens RS. 2003. Global stage-specific  
669 gene regulation during the developmental cycle of *Chlamydia trachomatis*. J Bacteriol  
670 185:3179-89.
- 671 10. Feklistov A, Sharon BD, Darst SA, Gross CA. 2014. Bacterial sigma factors: a historical,  
672 structural, and genomic perspective. Annu Rev Microbiol 68:357-76.
- 673 11. Rosario CJ, Hanson BR, Tan M. 2014. The transcriptional repressor EUO regulates both  
674 subsets of Chlamydia late genes. Mol Microbiol 94:888-97.
- 675 12. Rosario CJ, Tan M. 2012. The early gene product EUO is a transcriptional repressor that  
676 selectively regulates promoters of Chlamydia late genes. Molecular microbiology 84:1097-  
677 107.
- 678 13. Rosario CJ, Tan M. 2016. Regulation of *Chlamydia* gene expression by tandem promoters  
679 with different temporal patterns. Journal of Bacteriology 198:363-369.
- 680 14. Mathews SA, Timms P. 2000. Identification and mapping of sigma-54 promoters in  
681 *Chlamydia trachomatis*. J Bacteriol 182:6239-42.
- 682 15. Mathews SA, Volp KM, Timms P. 1999. Development of a quantitative gene expression  
683 assay for *Chlamydia trachomatis* identified temporal expression of sigma factors. FEBS  
684 Lett 458:354-8.
- 685 16. Domman D, Horn M. 2015. Following the Footsteps of Chlamydial Gene Regulation.  
686 Molecular Biology and Evolution 32:3035-3046.
- 687 17. Akers JC, Tan M. 2006. Molecular mechanism of tryptophan-dependent transcriptional  
688 regulation in *Chlamydia trachomatis*. J Bacteriol 188:4236-43.
- 689 18. Carlson JH, Wood H, Roshick C, Caldwell HD, McClarty G. 2006. In vivo and in vitro  
690 studies of *Chlamydia trachomatis* TrpR:DNA interactions. Mol Microbiol 59:1678-91.
- 691 19. Wood H, Roshick C, McClarty G. 2004. Tryptophan recycling is responsible for the  
692 interferon-gamma resistance of *Chlamydia psittaci* GPIC in indoleamine dioxygenase-  
693 expressing host cells. Molecular microbiology 52:903-16.
- 694 20. Makarova KS, Mironov AA, Gelfand MS. 2001. Conservation of the binding site for the  
695 arginine repressor in all bacterial lineages. Genome Biol 2:RESEARCH0013.
- 696 21. Schaumburg CS, Tan M. 2006. Arginine-dependent gene regulation via the ArgR repressor  
697 is species specific in chlamydia. J Bacteriol 188:919-27.
- 698 22. Case ED, Akers JC, Tan M. 2011. CT406 encodes a chlamydial ortholog of NrdR, a  
699 repressor of ribonucleotide reductase. J Bacteriol 193:4396-404.
- 700 23. Akers JC, HoDac H, Lathrop RH, Tan M. 2011. Identification and functional analysis of  
701 CT069 as a novel transcriptional regulator in *Chlamydia*. Journal of bacteriology  
702 193:6123-6131.
- 703 24. Thompson CC, Nicod SS, Malcolm DS, Grieshaber SS, Carabeo RA. 2012. Cleavage of a  
704 putative metal permease in *Chlamydia trachomatis* yields an iron-dependent transcriptional  
705 repressor. Proc Natl Acad Sci U S A 109:10546-51.
- 706 25. Koo IC, Stephens RS. 2003. A developmentally regulated two-component signal  
707 transduction system in *Chlamydia*. J Biol Chem 278:17314-9.
- 708 26. Barta ML, Hickey JM, Anbanandam A, Dyer K, Hammel M, Hefty PS. 2014. Atypical  
709 response regulator ChxR from *Chlamydia trachomatis* is structurally poised for DNA  
710 binding. PLoS One 9:e91760.
- 711 27. Hickey JM, Hefty PS, Lamb AL. 2009. Expression, purification, crystallization and  
712 preliminary X-ray analysis of the DNA-binding domain of a *Chlamydia trachomatis*

- 713           OmpR/PhoB-subfamily response regulator homolog, ChxR. Acta Crystallogr Sect F Struct  
714           Biol Cryst Commun 65:791-4.
- 715   28.   Hickey JM, Lovell S, Battaile KP, Hu L, Middaugh CR, Hefty PS. 2011. The atypical  
716           response regulator protein ChxR has structural characteristics and dimer interface  
717           interactions that are unique within the OmpR/PhoB subfamily. J Biol Chem 286:32606-16.
- 718   29.   Hickey JM, Weldon L, Hefty PS. 2011. The atypical OmpR/PhoB response regulator ChxR  
719           from *Chlamydia trachomatis* forms homodimers in vivo and binds a direct repeat of  
720           nucleotide sequences. J Bacteriol 193:389-98.
- 721   30.   Koo IC, Walthers D, Hefty PS, Kenney LJ, Stephens RS. 2006. ChxR is a transcriptional  
722           activator in *Chlamydia*. Proc Natl Acad Sci U S A 103:750-5.
- 723   31.   Hanson BR, Tan M. 2015. Transcriptional regulation of the *Chlamydia* heat shock stress  
724           response in an intracellular infection. Mol Microbiol 97:1158-67.
- 725   32.   Wilson AC, Tan M. 2004. Stress response gene regulation in *Chlamydia* is dependent on  
726           HrcA-CIRCE interactions. J Bacteriol 186:3384-91.
- 727   33.   Wichlan DG, Hatch TP. 1993. Identification of an early-stage gene of *Chlamydia psittaci*  
728           6BC. J Bacteriol 175:2936-42.
- 729   34.   Zhang L, Douglas AL, Hatch TP. 1998. Characterization of a *Chlamydia psittaci* DNA  
730           binding protein (EUO) synthesized during the early and middle phases of the  
731           developmental cycle. Infect Immun 66:1167-73.
- 732   35.   Bao X, Nickels BE, Fan H. 2012. *Chlamydia trachomatis* protein GrgA activates  
733           transcription by contacting the nonconserved region of  $\sigma^{66}$ . Proc Natl Acad Sci USA  
734           109:16870-16875.
- 735   36.   Desai M, Wurihan W, Di R, Fondell JD, Nickels BE, Bao X, Fan H. 2018. Role for GrgA  
736           in regulation of  $\sigma^{28}$ -dependent transcription in the obligate intracellular bacterial pathogen  
737           *Chlamydia trachomatis*. J Bacteriol 200.
- 738   37.   Desai M, Di R, Fan H. 2019. Application of biolayer interferometry (BLI) for studying  
739           protein-protein interactions in transcription. JoVE doi:doi:10.3791/59687:e59687.
- 740   38.   Wang Y, Kahane S, Cutcliffe LT, Skilton RJ, Lambden PR, Clarke IN. 2011. Development  
741           of a transformation system for *Chlamydia trachomatis*: restoration of glycogen  
742           biosynthesis by acquisition of a plasmid shuttle vector. PLoS Pathogens 7:e1002258.
- 743   39.   Wang Y, LaBrie SD, Carrell SJ, Suchland RJ, Dimond ZE, Kwong F, Rockey DD, Hefty  
744           PS, Hybiske K. 2019. Development of transposon mutagenesis for *Chlamydia muridarum*.  
745           J Bacteriol 201.
- 746   40.   Gomes JP, Nunes A, Bruno WJ, Borrego MJ, Florindo C, Dean D. 2006. Polymorphisms  
747           in the nine polymorphic membrane proteins of *Chlamydia trachomatis* across all serovars:  
748           evidence for serovar Da recombination and correlation with tissue tropism. Journal of  
749           bacteriology 188:275-286.
- 750   41.   Thomson NR, Holden MTG, Carder C, Lennard N, Lockey SJ, Marsh P, Skipp P, O'Connor  
751           CD, Goodhead I, Norbertzack H, Harris B, Ormond D, Rance R, Quail MA, Parkhill J,  
752           Stephens RS, Clarke IN. 2008. *Chlamydia trachomatis*: Genome sequence analysis of  
753           lymphogranuloma venereum isolates. Genome Res 18:161-171.
- 754   42.   Albrecht M, Sharma CM, Reinhardt R, Vogel J, Rudel T. 2010. Deep sequencing-based  
755           discovery of the *Chlamydia trachomatis* transcriptome. Nucleic acids research 38:868-877.
- 756   43.   Ferreira R, Borges V, Borrego MJ, Gomes JP. 2017. Global survey of mRNA levels and  
757           decay rates of *Chlamydia trachomatis* trachoma and lymphogranuloma venereum biovars.  
758           Heliyon 3:e00364-e00364.

- 759 44. Balleza E, López-Bojorquez LN, Martínez-Antonio A, Resendis-Antonio O, Lozada-  
760 Chávez I, Balderas-Martínez YI, Encarnación S, Collado-Vides J. 2009. Regulation by  
761 transcription factors in bacteria: beyond description. *FEMS microbiology reviews* 33:133-  
762 151.
- 763 45. Weinstein-Fischer D, Altuvia S. 2007. Differential regulation of *Escherichia coli*  
764 topoisomerase I by Fis. *Mol Microbiol* 63:1131-44.
- 765 46. t Hoen PAC, Friedländer MR, Almlöf J, Sammeth M, Pulyakhina I, Anvar SY, Laros JFJ,  
766 Buermans HPJ, Karlberg O, Brännvall M, van Ommen G-JB, Estivill X, Guigó R, Syvänen  
767 A-C, Gut IG, Dermitzakis ET, Antonarakis SE, Brazma A, Flicek P, Schreiber S,  
768 Rosenstiel P, Meitinger T, Strom TM, Lehrach H, Sudbrak R, Carracedo A, t Hoen PAC,  
769 Pulyakhina I, Anvar SY, Laros JFJ, Buermans HPJ, van Iterson M, Friedländer MR,  
770 Monlong J, Lizano E, Bertier G, Ferreira PG, Sammeth M, Almlöf J, Karlberg O, Brännvall  
771 M, Ribeca P, Griebel T, Beltran S, Gut M, Kahlem K, Lappalainen T, Giger T, Ongen H,  
772 Padioleau I, et al. 2013. Reproducibility of high-throughput mRNA and small RNA  
773 sequencing across laboratories. *Nature Biotechnology* 31:1015-1022.
- 774 47. Brinkworth AJ, Wildung MR, Carabeo RA. 2018. Genomewide Transcriptional Responses  
775 of Iron-Starved *Chlamydia trachomatis* Reveal Prioritization of Metabolic Precursor  
776 Synthesis over Protein Translation. *mSystems* 3:e00184-17.
- 777 48. Skipp PJ, Hughes C, McKenna T, Edwards R, Langridge J, Thomson NR, Clarke IN. 2016.  
778 Quantitative Proteomics of the Infectious and Replicative Forms of *Chlamydia*  
779 *trachomatis*. *PLoS One* 11:e0149011.
- 780 49. Saka HA, Thompson JW, Chen YS, Kumar Y, Dubois LG, Moseley MA, Valdivia RH.  
781 2011. Quantitative proteomics reveals metabolic and pathogenic properties of *Chlamydia*  
782 *trachomatis* developmental forms. *Mol Microbiol* 82:1185-203.
- 783 50. Lund PA. 2001. Microbial molecular chaperones. *Adv Microb Physiol* 44:93-140.
- 784 51. Baldini RL, Avedissian M, Gomes SL. 1998. The CIRCE element and its putative repressor  
785 control cell cycle expression of the *Caulobacter crescentus* *groESL* operon. *Journal of*  
786 *Bacteriology* 180:1632-1641.
- 787 52. Bellier A, Mazodier P. 2004. ClgR, a novel regulator of *clp* and *lon* expression in  
788 *Streptomyces*. *Journal of Bacteriology* 186:3238-3248.
- 789 53. Belland RJ, Nelson DE, Virok D, Crane DD, Hogan D, Sturdevant D, Beatty WL, Caldwell  
790 HD. 2003. Transcriptome analysis of chlamydial growth during IFN- $\gamma$ -mediated  
791 persistence and reactivation. *Proceedings of the National Academy of Sciences* 100:15971-  
792 15976.
- 793 54. Slade JA, Brockett M, Singh R, Liechti GW, Maurelli AT. 2019. Fosmidomycin, an  
794 inhibitor of isoprenoid synthesis, induces persistence in *Chlamydia* by inhibiting  
795 peptidoglycan assembly. *PLOS Pathogens* 15:e1008078.
- 796 55. Dreses-Werringloer U, Padubrin I, Zeidler H, Kohler L. 2001. Effects of Azithromycin and  
797 Rifampin on *Chlamydia trachomatis* Infection In Vitro. *Antimicrob Agents Chemother* %R  
798 101128/AAC45113001-30082001 45:3001-3008.
- 799 56. Verma A, Maurelli AT. 2003. Identification of two eukaryote-like serine/threonine kinases  
800 encoded by *Chlamydia trachomatis* serovar L2 and characterization of interacting partners  
801 of Pkn1. *Infect Immun* 71:5772-84.
- 802 57. Johnson DL, Mahony JB. 2007. *Chlamydophila pneumoniae* PknD exhibits dual amino  
803 acid specificity and phosphorylates Cpn0712, a putative type III secretion YscD homolog.  
804 *J Bacteriol* 189:7549-55.



- 805 58. Johnson DL, Stone CB, Bulir DC, Coombes BK, Mahony JB. 2009. A novel inhibitor of  
806 *Chlamydomonas reinhardtii* protein kinase D (PknD) inhibits phosphorylation of CdsD  
807 and suppresses bacterial replication. *BMC Microbiol* 9:218.
- 808 59. Claywell JE, Fisher DJ. 2016. CTL0511 from *Chlamydia trachomatis* Is a Type 2C Protein  
809 Phosphatase with Broad Substrate Specificity. *J Bacteriol* 198:1827-36.
- 810 60. Kottur J, Nair DT. 2018. Pyrophosphate hydrolysis is an intrinsic and critical step of the  
811 DNA synthesis reaction. *Nucleic Acids Research* 46:5875-5885.
- 812 61. Heuston S, Begley M, Gahan CGM, Hill C. 2012. Isoprenoid biosynthesis in bacterial  
813 pathogens. *Microbiology* 158:1389-1401.
- 814 62. McAteer S, Coulson A, McLennan N, Masters M. 2001. The *lytB* gene of *Escherichia coli*  
815 is essential and specifies a product needed for isoprenoid biosynthesis. *J Bacteriol*  
816 183:7403-7407.
- 817 63. Grieshaber NA, Fischer ER, Mead DJ, Dooley CA, Hackstadt T. 2004. Chlamydial  
818 histone-DNA interactions are disrupted by a metabolite in the methylerythritol phosphate  
819 pathway of isoprenoid biosynthesis. *Proceedings of the National Academy of Sciences of*  
820 *the United States of America* 101:7451-6.
- 821 64. Grieshaber NA, Sager JB, Dooley CA, Hayes SF, Hackstadt T. 2006. Regulation of the  
822 *Chlamydia trachomatis* histone H1-like protein Hc2 is IspE dependent and IhtA  
823 independent. *Journal of Bacteriology* 188:5289-92.
- 824 65. Yao J, Abdelrahman YM, Robertson RM, Cox JV, Belland RJ, White SW, Rock CO. 2014.  
825 Type II fatty acid synthesis is essential for the replication of *Chlamydia trachomatis*. *J Biol*  
826 *Chem* 289:22365-76.
- 827 66. Duong F, Wickner W. 1997. Distinct catalytic roles of the SecYE, SecG and SecDFyajC  
828 subunits of preprotein translocase holoenzyme. *Embo j* 16:2756-68.
- 829 67. Stenner-Liewen F, Liewen H, Zapata JM, Pawlowski K, Godzik A, Reed JC. 2002. CADD,  
830 a *Chlamydia* protein that interacts with death receptors. *J Biol Chem* 277:9633-6.
- 831 68. Schwarzenbacher R, Stenner-Liewen F, Liewen H, Robinson H, Yuan H, Bossy-Wetzel E,  
832 Reed JC, Liddington RC. 2004. Structure of the *Chlamydia* protein CADD reveals a redox  
833 enzyme that modulates host-cell apoptosis. *J Biol Chem*.
- 834 69. Liu X, Afrane M, Clemmer DE, Zhong G, Nelson DE. 2010. Identification of *Chlamydia*  
835 *trachomatis* outer membrane complex proteins by differential proteomics. *J Bacteriol*  
836 192:2852-60.
- 837 70. Birkelund S, Morgan-Fisher M, Timmerman E, Gevaert K, Shaw AC, Christiansen G.  
838 2009. Analysis of proteins in *Chlamydia trachomatis* L2 outer membrane complex, COMC.  
839 *FEMS Immunology & Medical Microbiology* 55:187-195.
- 840 71. Travers A, Muskhelishvili G. 2005. DNA supercoiling — a global transcriptional regulator  
841 for enterobacterial growth? *Nature Reviews Microbiology* 3:157-169.
- 842 72. Durfee T, Hansen AM, Zhi H, Blattner FR, Jin DJ. 2008. Transcription profiling of the  
843 stringent response in *Escherichia coli*. *J Bacteriol* 190:1084-96.
- 844 73. Wurihan W, Huang Y, Weber AM, Wu X, Fan H. 2020. Nonspecific toxicities of  
845 *Streptococcus pyogenes* and *Staphylococcus aureus* dCas9 in *Chlamydia trachomatis*.  
846 *Pathogens and disease* doi:10.1093/femspd/ftaa005:ftaa005.
- 847 74. Wickstrum J, Sammons LR, Restivo KN, Hefty PS. 2013. Conditional gene expression in  
848 *Chlamydia trachomatis* using the tet system. *PLoS One* 8:e76743.
- 849 75. Wilson AC, Tan M. 2002. Functional analysis of the heat shock regulator HrcA of  
850 *Chlamydia trachomatis*. *J Bacteriol* 184:6566-71.

- 851 76. Balakrishnan A, Patel B, Sieber SA, Chen D, Pachikara N, Zhong G, Cravatt BF, Fan H.  
852 2006. Metalloprotease inhibitors GM6001 and TAPI-0 inhibit the obligate intracellular  
853 human pathogen *Chlamydia trachomatis* by targeting peptide deformylase of the  
854 bacterium. *J Biol Chem* 281:16691-16699.
- 855 77. Caldwell HD, Kromhout J, Schachter J. 1981. Purification and partial characterization of  
856 the major outer membrane protein of *Chlamydia trachomatis*. *Infect Immun* 31:1161-76.
- 857 78. Zhang YX, Stewart SJ, Caldwell HD. 1989. Protective monoclonal antibodies to  
858 *Chlamydia trachomatis* serovar- and serogroup-specific major outer membrane protein  
859 determinants. *Infect Immun* 57:636-8.
- 860 79. Desai M, Zhang H, Fan H. 2020. Optimal cultivation of *Chlamydia* requires testing of  
861 serum on individual species. *BMC Research Notes* 13:28.
- 862 80. Xu S, Battaglia L, Bao X, Fan H. 2013. Chloramphenicol acetyltransferase as a selection  
863 marker for chlamydial transformation. *BMC Res Notes* 6:377.
- 864 81. Mueller KE, Fields KA. 2015. Application of beta-lactamase reporter fusions as an  
865 indicator of effector protein secretion during infections with the obligate intracellular  
866 pathogen *Chlamydia trachomatis*. *PLoS One* 10.
- 867 82. Abdelrahman Y, Ouellette SP, Belland RJ, Cox JV. 2016. Polarized Cell Division of  
868 *Chlamydia trachomatis*. *PLoS Pathog* 12:e1005822.
- 869 83. Schneider CA, Rasband WS, Eliceiri KW. 2012. NIH Image to ImageJ: 25 years of image  
870 analysis. *Nat Methods* 9:671-5.
- 871 84. Bao X, Gylfe A, Sturdevant GL, Gong Z, Xu S, Caldwell HD, Elofsson M, Fan H. 2014.  
872 Benzylidene acylhydrazides inhibit chlamydial growth in a type III secretion- and iron  
873 chelation-independent manner. *J Bacteriol* 196:2989-3001.
- 874 85. Trapnell C, Roberts A, Goff L, Pertea G, Kim D, Kelley DR, Pimentel H, Salzberg SL,  
875 Rinn JL, Pachter L. 2012. Differential gene and transcript expression analysis of RNA-seq  
876 experiments with TopHat and Cufflinks. *Nat Protoc* 7:562-78.
- 877 86. Anders S, Pyl PT, Huber W. 2015. HTSeq--a Python framework to work with high-  
878 throughput sequencing data. *Bioinformatics (Oxford, England)* 31:166-169.
- 879 87. Anders S, Huber W. 2010. Differential expression analysis for sequence count data.  
880 *Genome biology* 11:R106-R106.
- 881 88. Wang Y, Xu M, Wang Z, Tao M, Zhu J, Wang L, Li R, Berceli SA, Wu R. 2012. How to  
882 cluster gene expression dynamics in response to environmental signals. *Brief Bioinform*  
883 13:162-74.  
884

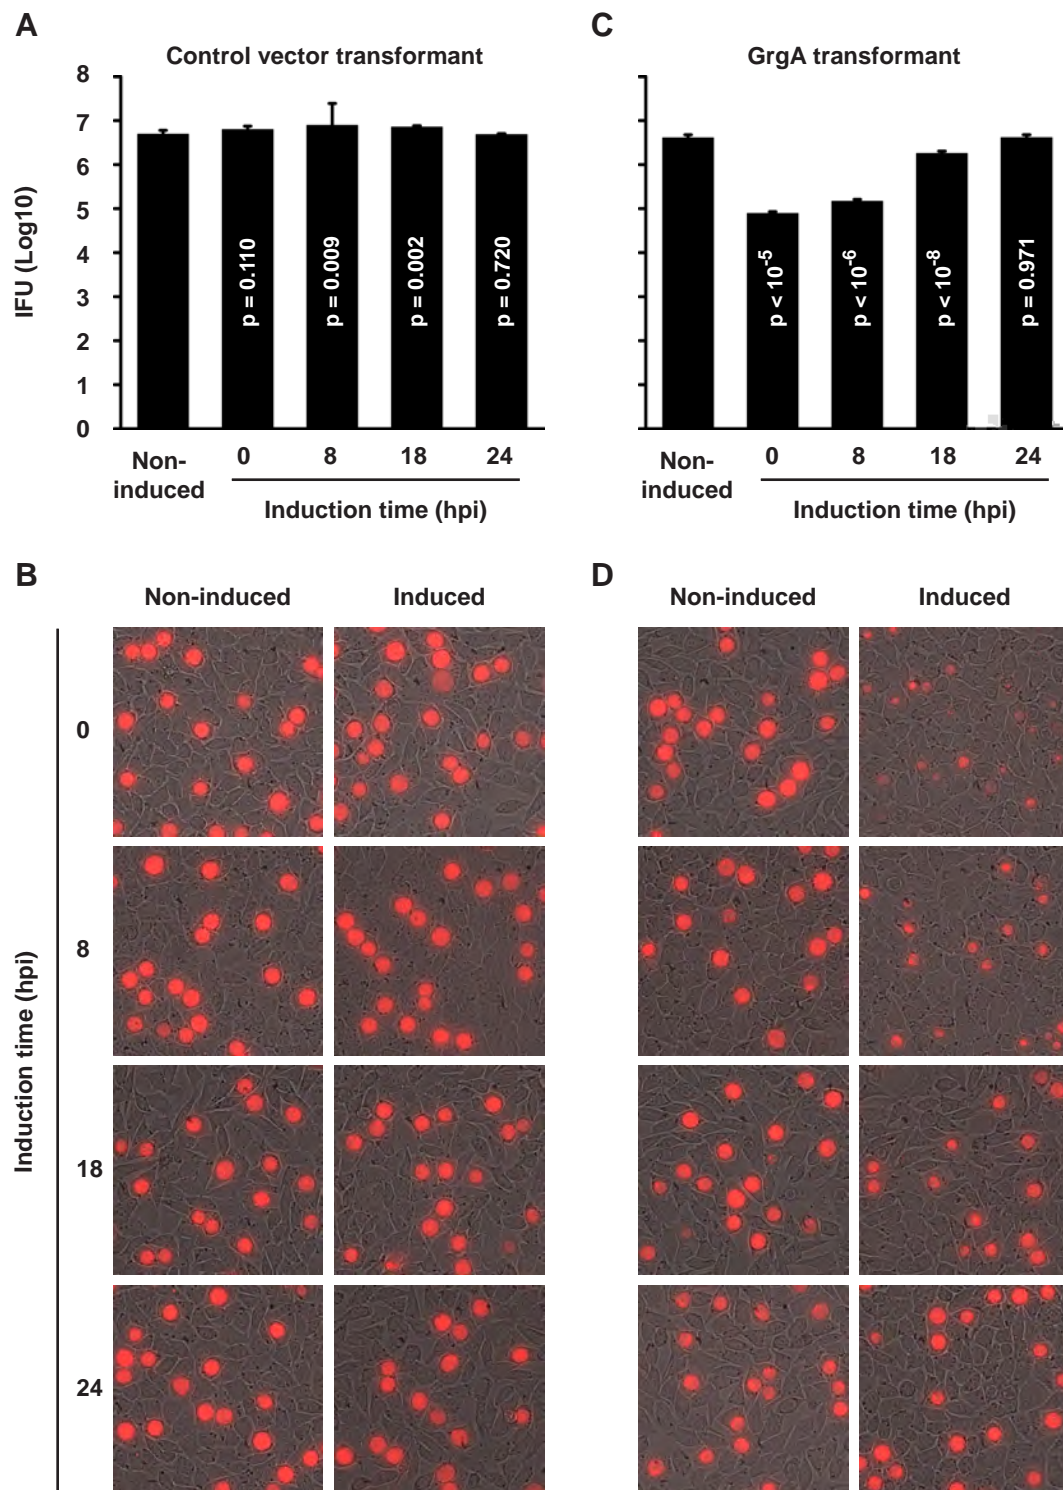

**Fig. 1. Ectopic expression of GrgA inhibits chlamydial growth.** ATC was added to cultures of control vector transformants (A, B) and GrgA transformants (C, D) at the indicated h post-inoculation (hpi). Number of progeny EBs formed were determined at 30 hpi (A, C); RFP-expressing inclusions in live cultures were imaged at 35 hpi (B, D). (A, C) Data are averages  $\pm$  standard deviations of triplicate experiments. See Fig. S4 for number of inclusions per image, inclusion sizes, and inclusion RFP intensities associated with panels B and D.

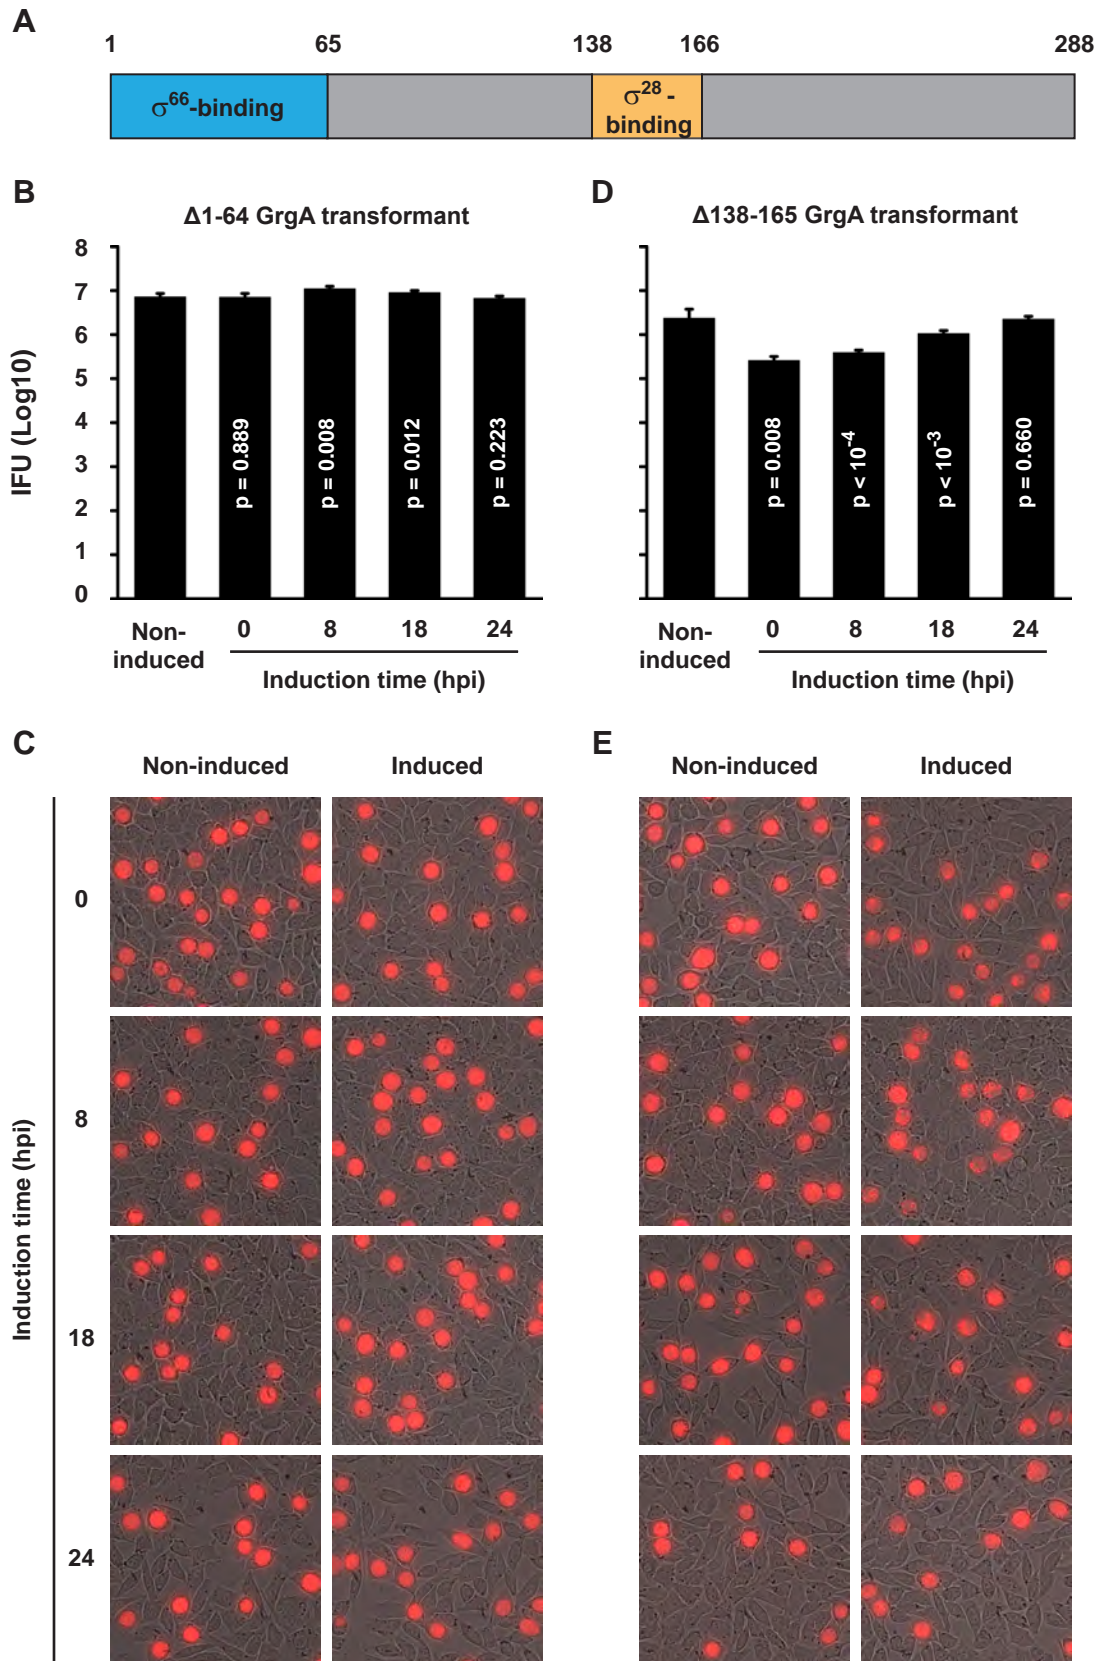

**Fig. 2. Differential effects of  $\sigma^{66}$ -binding-defective  $\Delta 1-64$  GrgA and  $\sigma^{28}$ -binding-defective  $\Delta 138-165$  GrgA overexpression on chlamydial growth.** Domain structure of the GrgA protein is shown in (A). Data were acquired in the same manner as for Fig. 1. See Fig. S6 for number of inclusions per image, inclusion sizes, and inclusion RFP intensities associated with panels C and E.

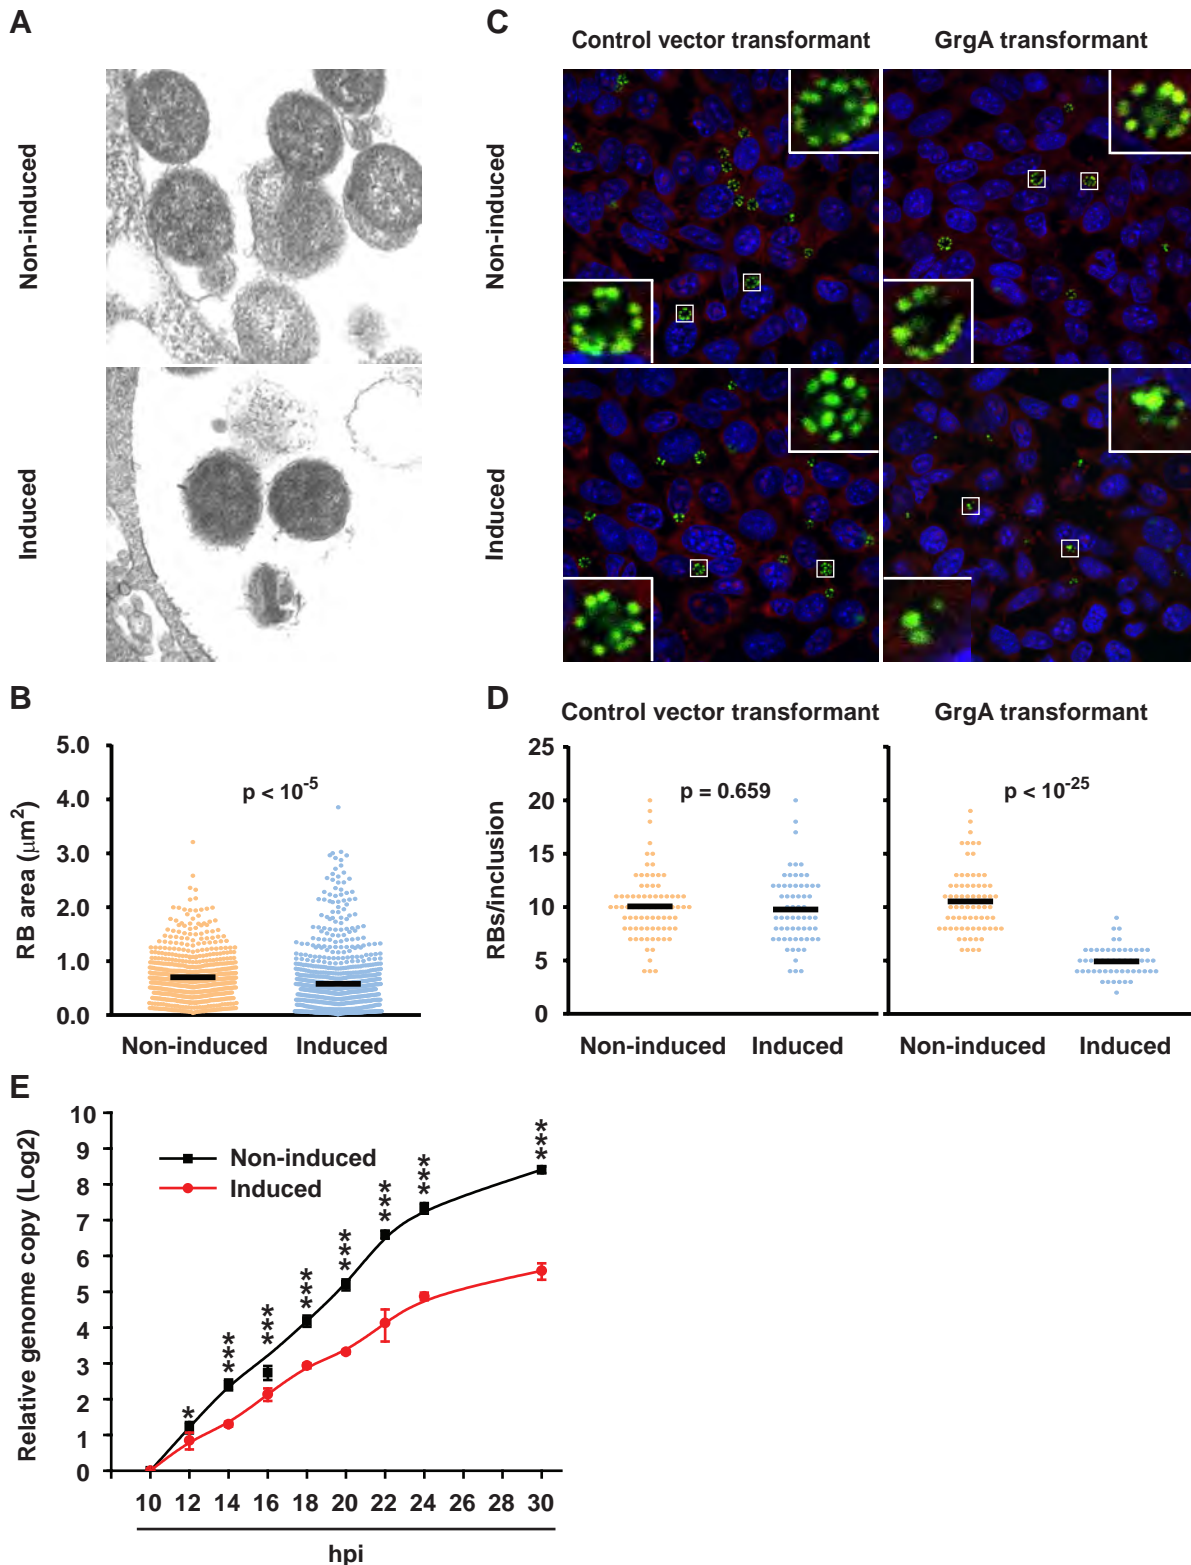

**Fig. 3. GrgA overexpression decreases RB volume expansion and replication.** (A) Representative TEM images of RBs formed by GrgA transformants in infected cells in either the absence or presence of ATC between 8 and 14 hpi. (B) Scattergram of the RB area data obtained from TEM images. (C) Confocal microscopy images of control and GrgA transformants in cells cultured with or without ATC during the periods of 8 to 14 hpi. (D) Scattergram of the number of RBs per inclusion analyzed by confocal microscopy. (E) Relative genome copy numbers in GrgA transformants cultured with or without ATC at 10 hpi. Data are averages  $\pm$  standard deviations of triplicate experiments. \*,  $p < 0.05$ ; \*\*\*,  $p < 0.001$ .

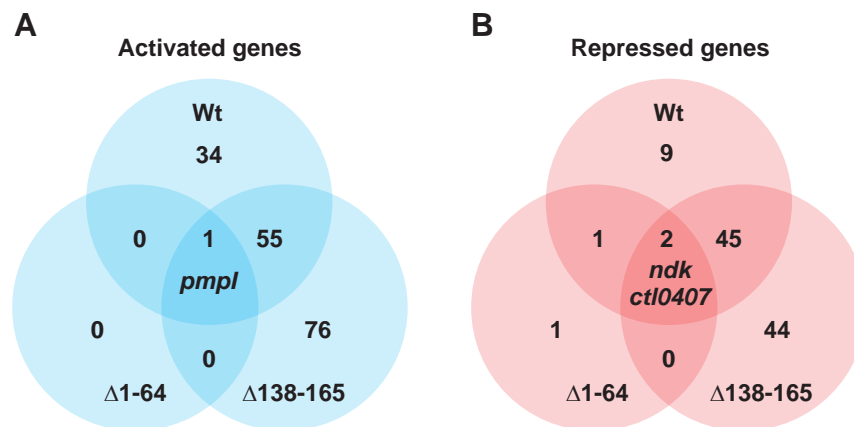

**Fig. 4. Venn diagram showing up- and down-regulated genes detected in full length (Wt) GrgA, Δ1-64 GrgA, and Δ138-165 GrgA transformants treated with ATC. The figure was prepared with data presented in Tables S8, S9. Up- or down-regulation was defined with  $\geq 33\%$  change with a P value  $\leq$  than 0.05.**

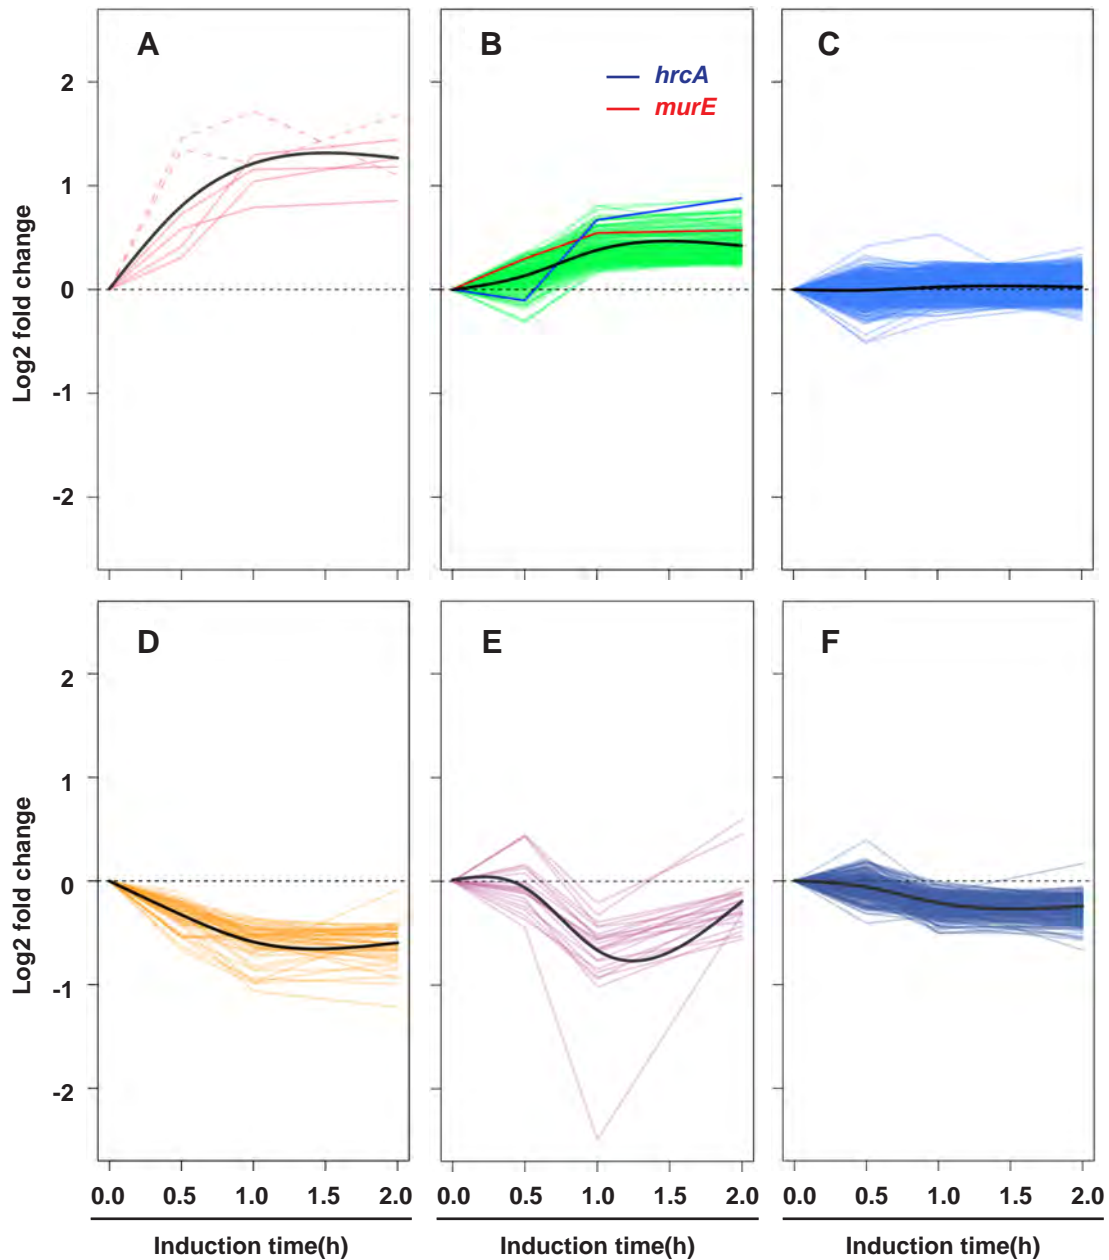

**Fig. 5. Temporal patterns of transcriptomic changes induced by GrgA overexpression.** Figures were derived from RNA-seq data presented in Table S10. (A) Six early target genes were increased by 0.5 h. RNAs whose increases were statistically significant ( $P < 0.05$ ) are shown in solid lines. RNAs which increased with a P value larger than 0.05 by 0.5 h are shown in dashed lines. (B) RNAs of 175 genes are stimulated by GrgA overexpression only after one hour of ATC induction. Red and blue lines are for the mRNAs of MurE and HrcA, respectively. (C) RNAs of 444 genes remained relatively constant. (D-F) Genes are down regulated following different kinetics. (A-F) Solid black lines are trend lines in respective groups.

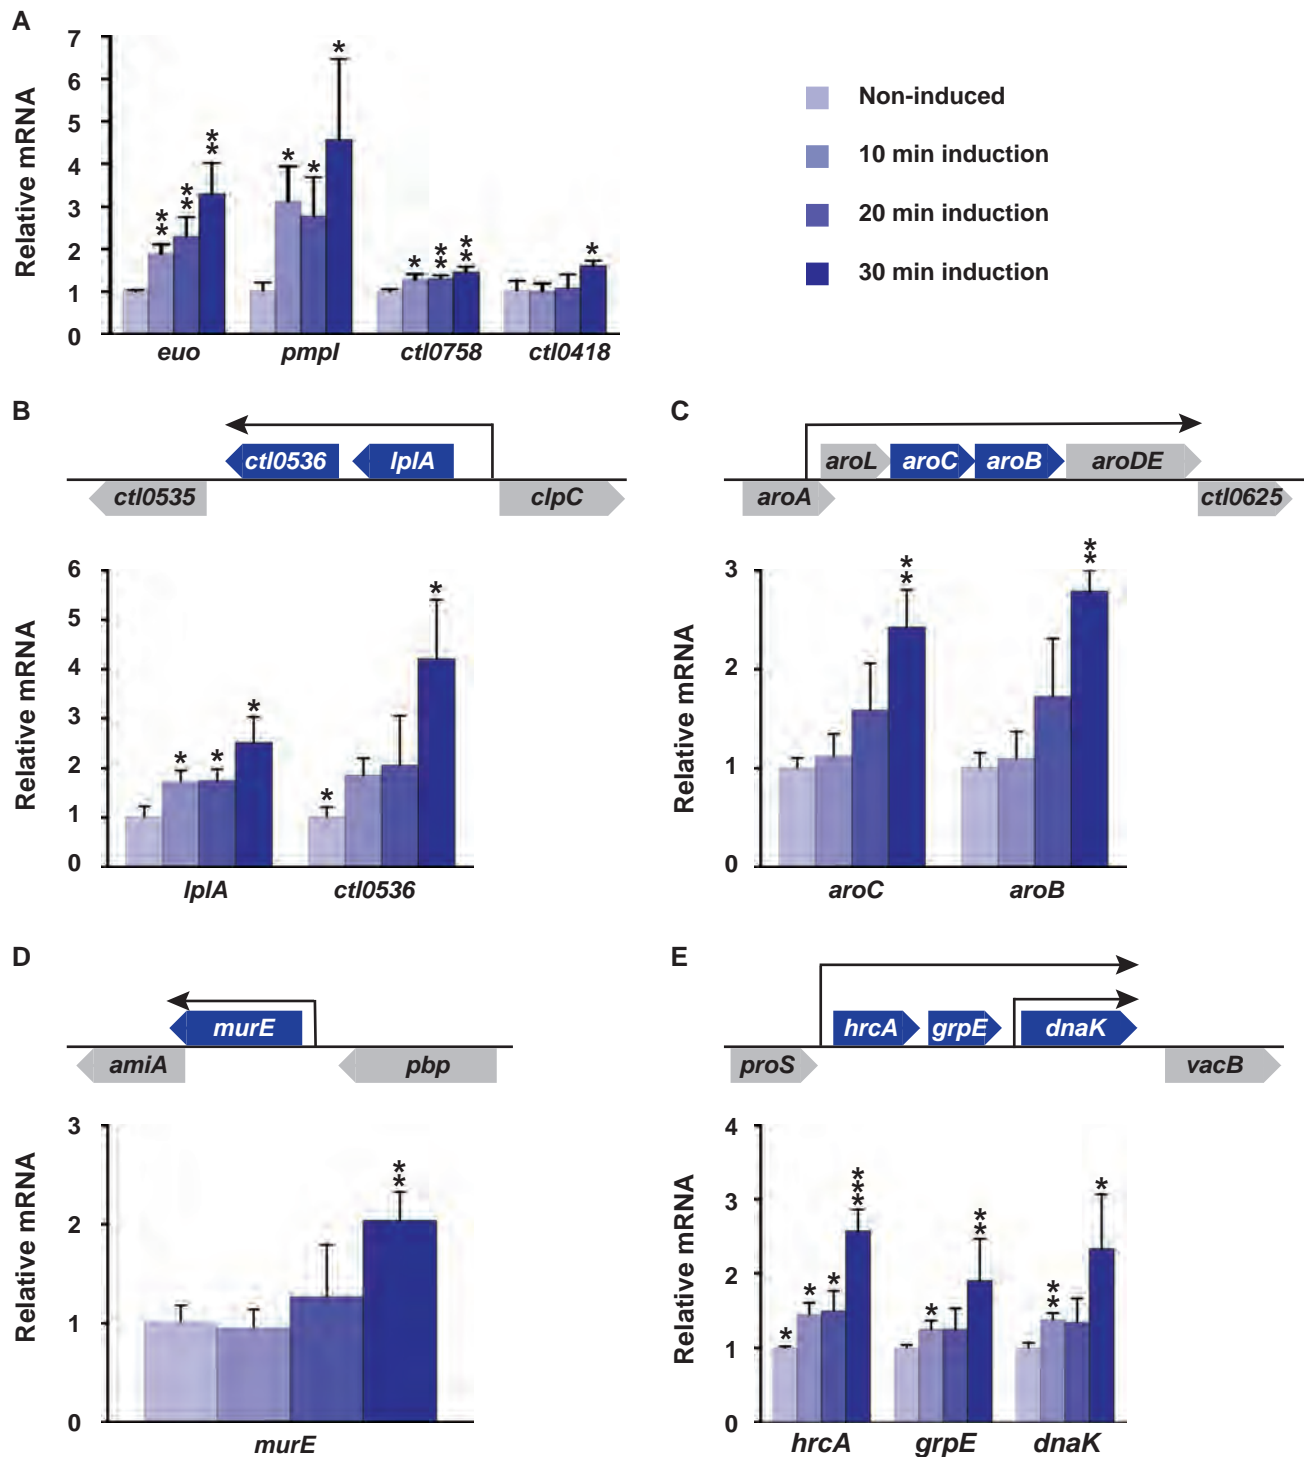

**Fig. 6. RT-qPCR detection or confirmation of early target genes of GrgA.** Relative mRNA levels of 5 non-operon genes are shown in (A, D) and those in operons are shown in B, C, and E. MurE (D) and HrcA (E) were identified as early genes only by RT-qPCR. See also Fig. S12. (A-E) Data are averages  $\pm$  standard deviations of triplicate experiments. \*,  $p < 0.05$ ; \*\*,  $p < 0.01$ ; \*\*\*,  $p < 0.001$ .



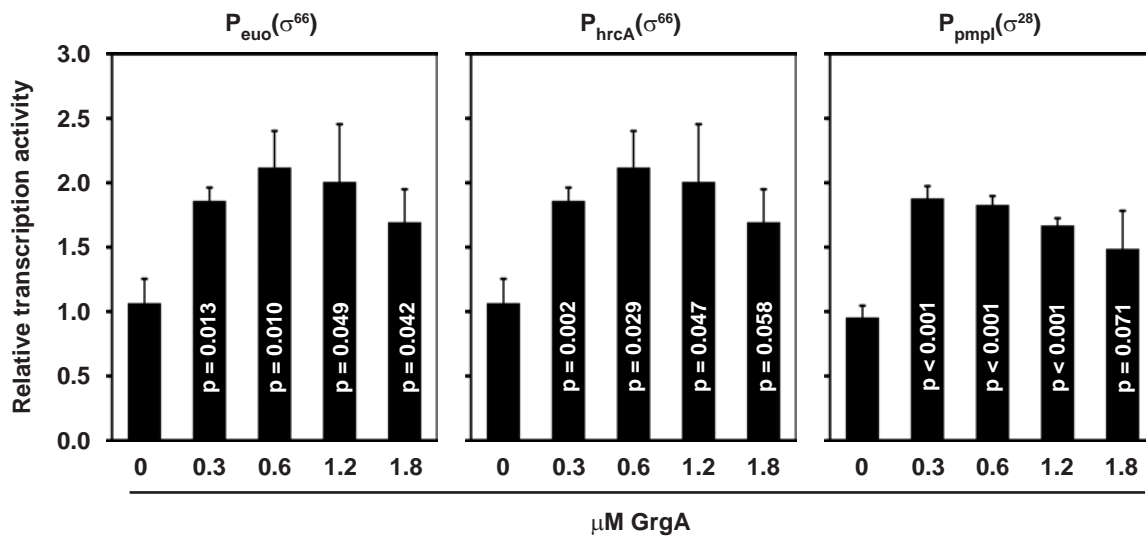

**Fig. 7. Stimulation of transcription from *euo*, *hrcA* and *pmpI* promoters by *GrgA* *in vitro*.** Data are average  $\pm$  standard deviations of triplicate experiments.

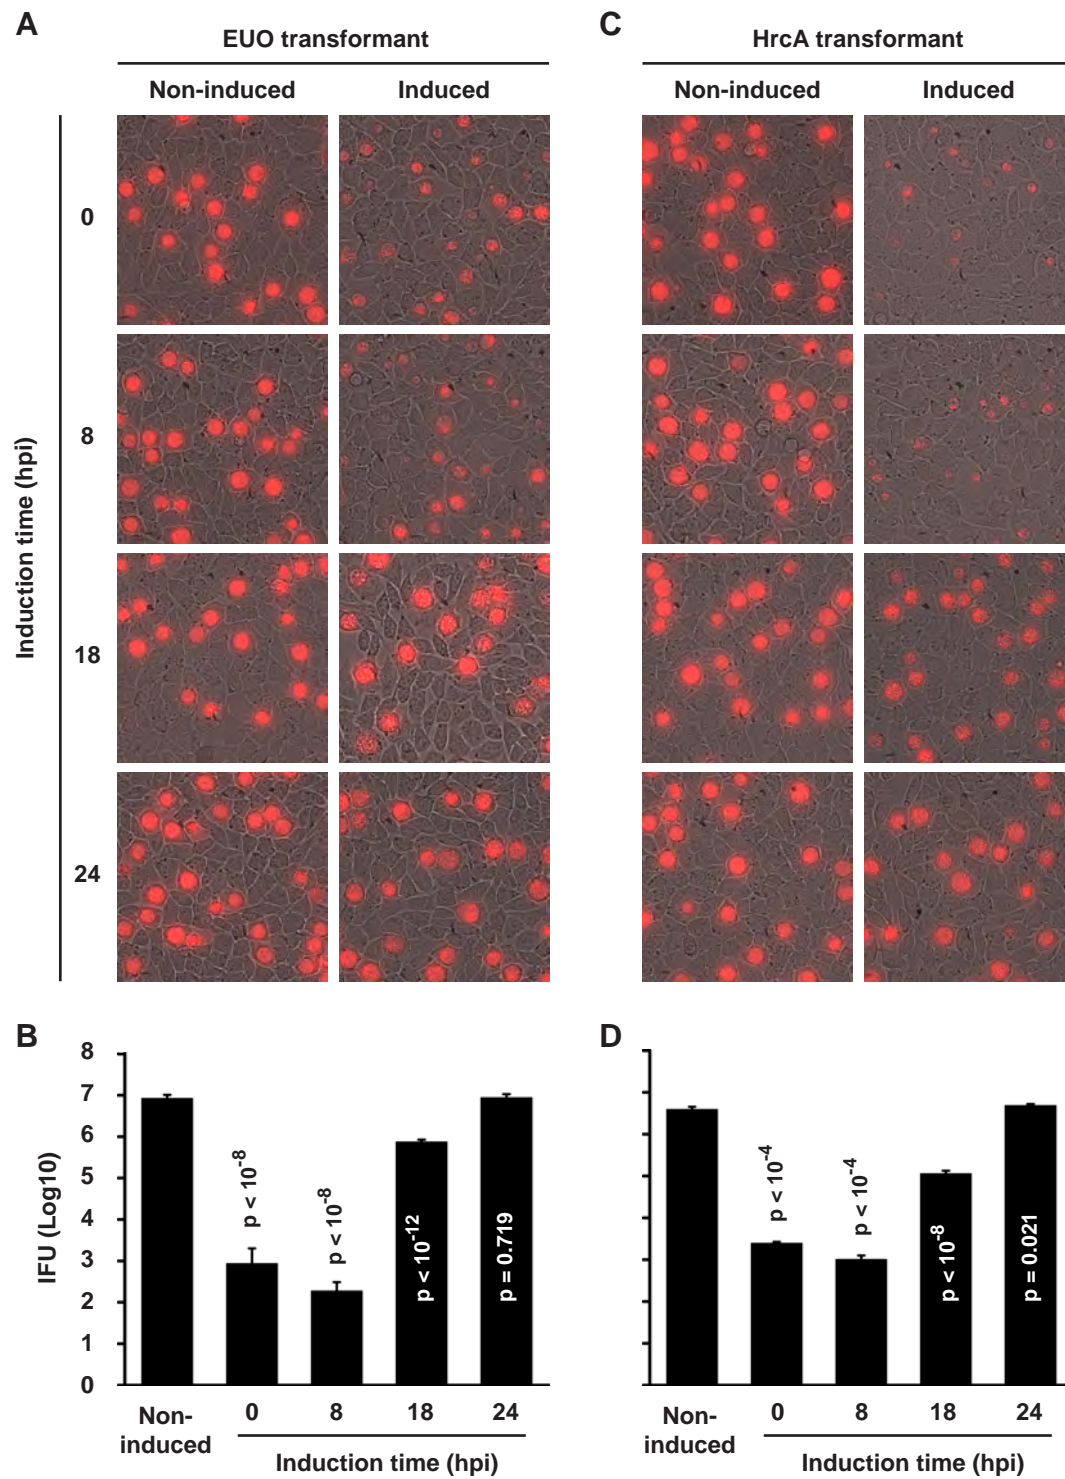

**Fig. 8. Inhibition of chlamydial growth by either Euo or HrcA overexpression.** Data were acquired in the same manner as for Fig. 1.

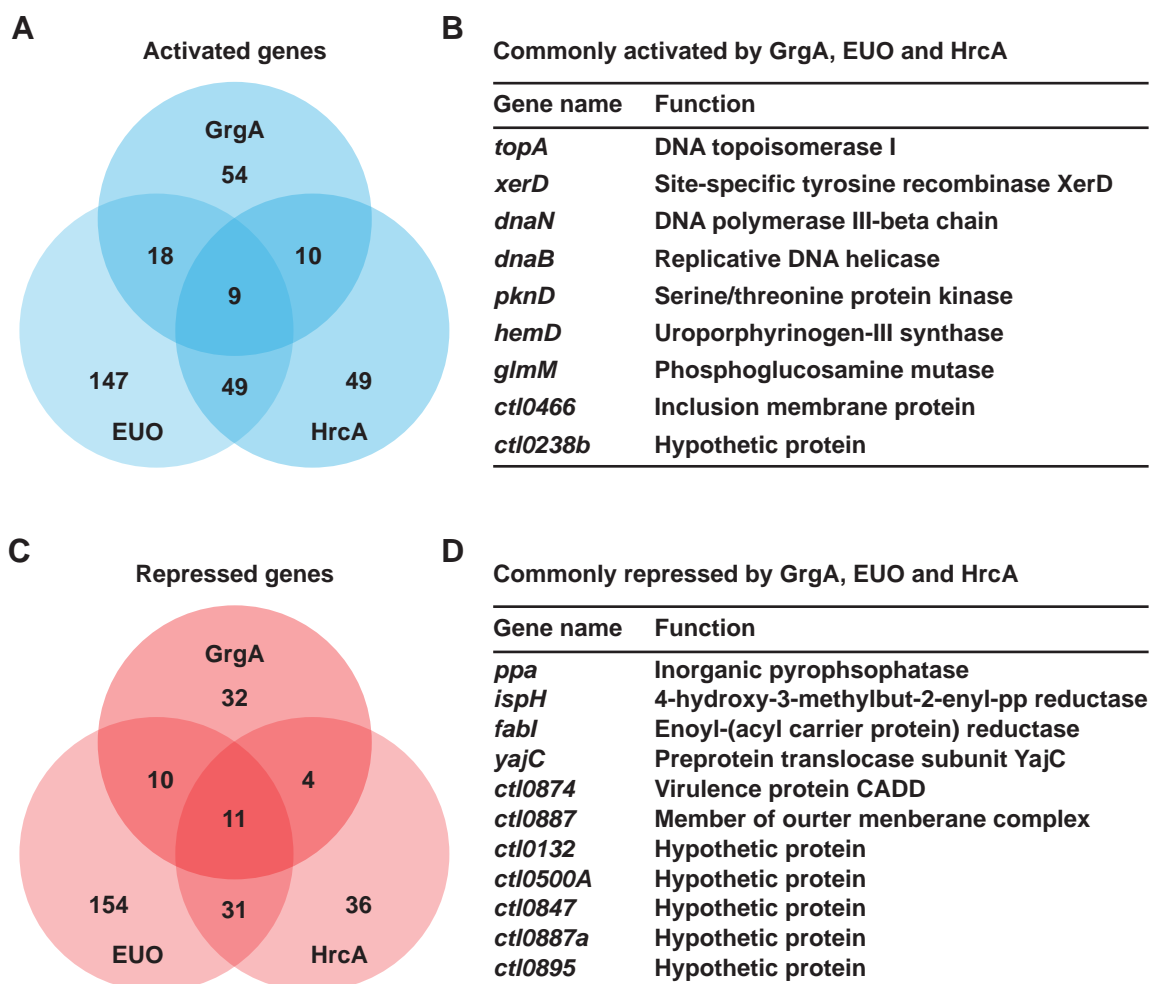

**Fig. 9. GrgA-, Euo-, and HrcA-coregulated genes.** (A, C) Venn diagrams showing numbers of genes activated (A) and repressed (C) by overexpression of each of the 3 TFs. (B, D) Lists of genes commonly activated (B) and repressed (D) by GrgA, Euo, and HrcA overexpression. Note that genes commonly activated and repressed by any two of the TFs are shown in Table S15 and S16, respectively.

A

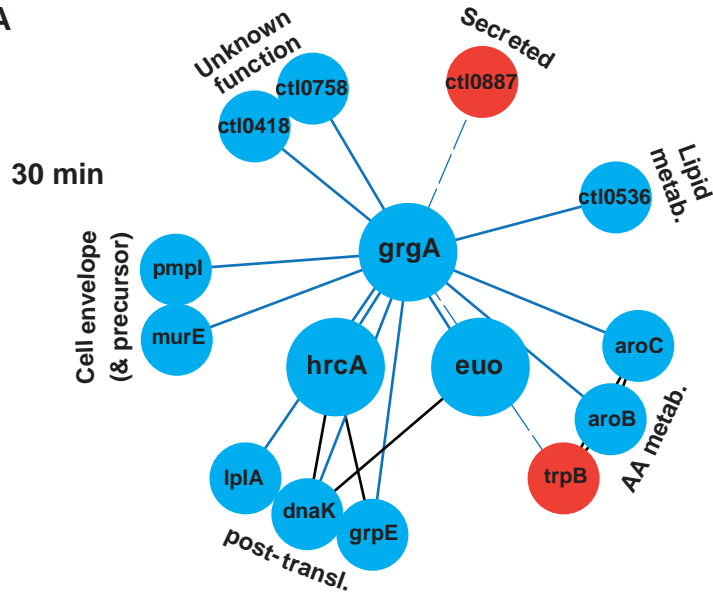

**Fig. 10. GrgA-regulated transcriptional network.**

(A) Network established within 30 min of ATC-induced GrgA overexpression. (B) Network developed by 4 h of ATC-induced GrgA overexpression. (A, B) Blue and red nodes are genes activated and repressed by GrgA, respectively. Solid and dashed lines connect TFs to activated and repressed genes, respectively. Blue, purple and green lines connect GrgA, Euo, and HrcA, respectively, to their target genes. Black lines connect genes in correlation identified by STRING-db v.11. Functional group are labeled. Abbreviations: AA, amino acid; metab., metabolism; Nt.M, nucleotide metabolism; Post-transl., posttranslational protein modification; recom, recombination; replic, replication.

B

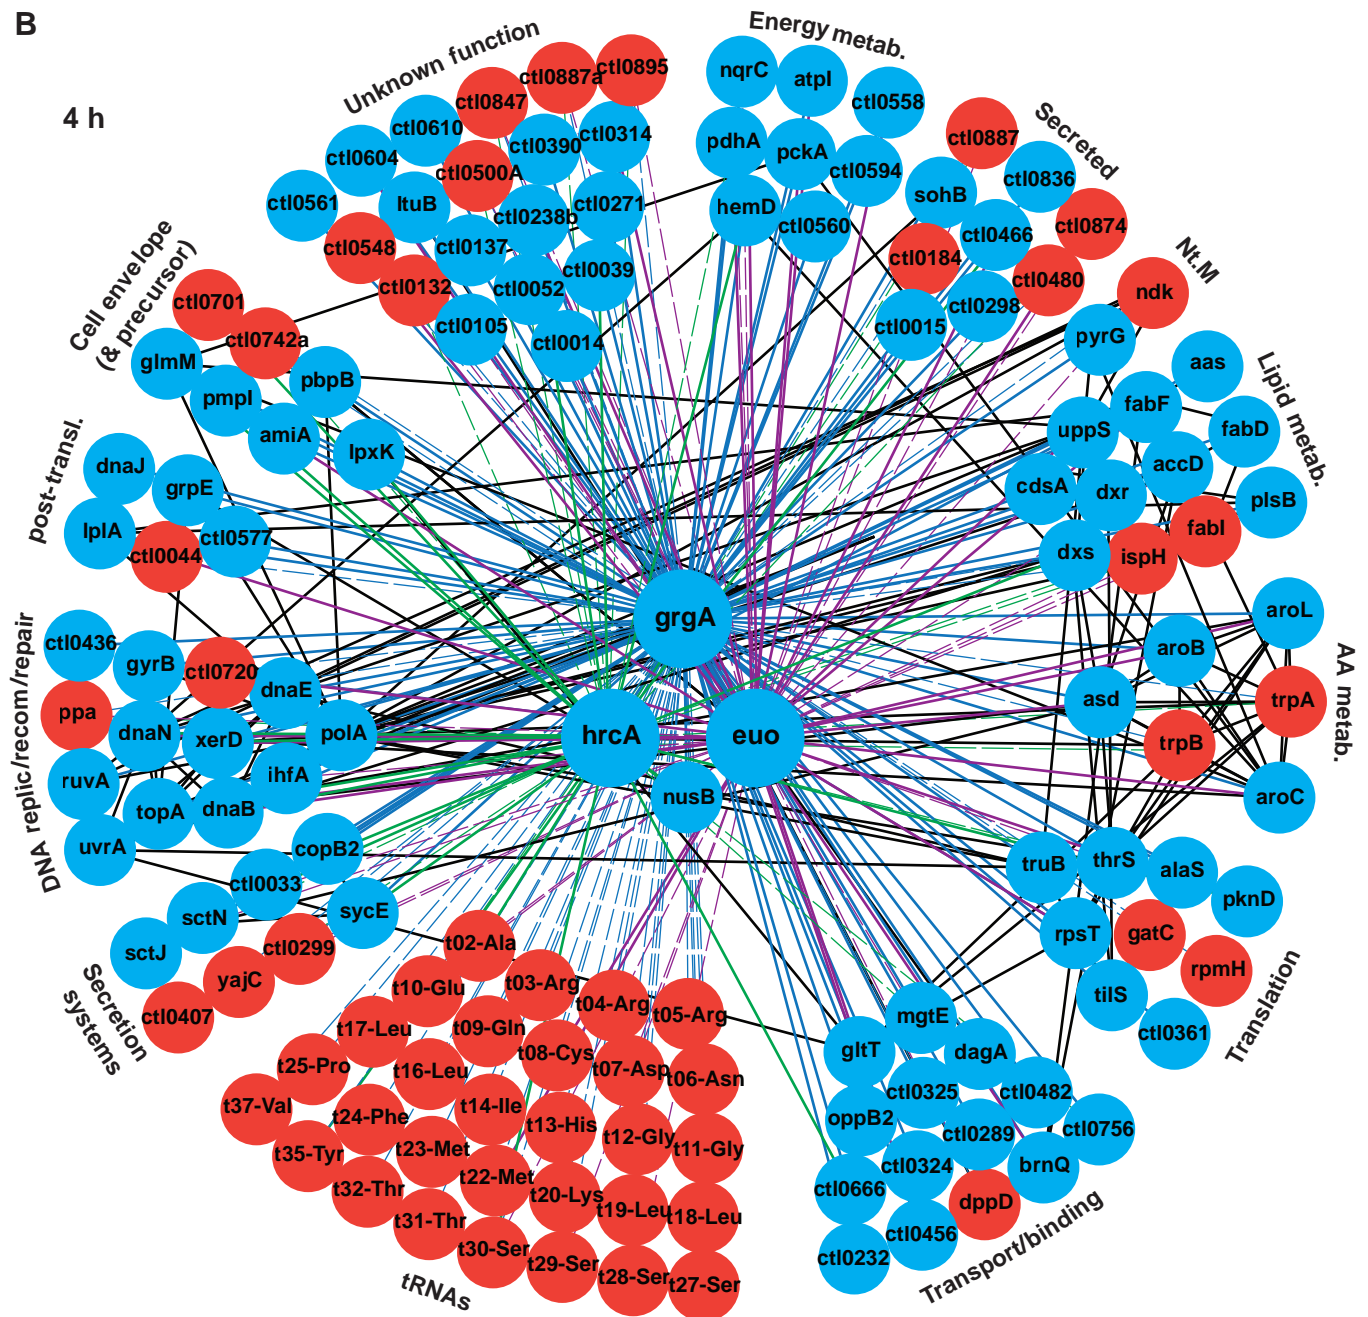

Source: https://www.biorxiv.org/content/biorxiv/early/2020/07/08/2020.07.08.194431.full.pdf
